# Supplementary material for: Learning in an Interactive Simulation Tool against Landslide Risks: The Role of Amount and Availability of Experiential Feedback
Source: Copernicus journal article supplement (doi:10.5194/nhess-2017-297), 2017-09-04
Supplement: Supplementary file [file nhess-2017-297-AC3-supplement.pdf]

# Learning in an Interactive Simulation Tool against Landslide Risks: The Role of Strength and Availability of Experiential Feedback

Pratik Chaturvedi<sup>1,2</sup>, Akshit Arora<sup>1,3</sup>, and Varun Dutt<sup>1</sup>

<sup>1</sup>Applied Cognitive Science Laboratory, Indian Institute of Technology, Mandi- 175005, India

<sup>2</sup>Defence Terrain Research Laboratory, Defence Research and Development Organization, Delhi -110054, India

<sup>3</sup>Computer Science and Engineering Department, Thapar University, Patiala - 147004, India

Correspondence to: Pratik Chaturvedi (prateek@dtrl.drdo.in)

**Abstract.** Feedback via simulation tools is likely to help people improve their decision-making against natural disasters, however, currently little is known on how differing strengths of experiential feedback and feedback's availability in simulation tools influences people's decisions against landslides. In an experiment involving participants, we tested the influence of differing strengths of experiential feedback and feedback's availability on people's decisions against landslide risks in an Interactive Landslide Simulation (ILS) tool. Experiential feedback (high or low) and feedback's availability (present or absent) were varied across four between-subject conditions: high-damage feedback-present, high-damage feedback-absent, low-damage feedback-present, and low-damage feedback-absent. In high-damage conditions, the probabilities of damages to life and property due to landslides were 10-times higher than those in the low-damage conditions. In feedback-present conditions, experiential feedback was provided in numeric, text, and graphical formats in ILS. In feedback-absent conditions, the probabilities of damages were described, however, there was no experiential feedback present. Investments were greater in conditions where experiential feedback was present and damages were high compared to conditions where experiential feedback was absent and damages were low. Furthermore, only high-damage feedback produced learning in ILS. Simulation tools like ILS seem appropriate for landslide risk communication and for performing what-if analyses.

## 1 Introduction

Landslides cause massive damages to life and property worldwide (Chaturvedi and Dutt, 2015; Margottini et al., 2011). Imparting knowledge about landslide causes-and-consequences as well as spreading awareness about landslide disaster mitigation are likely to be effective ways of managing landslide risks. The former approach supports structural protection measures that are likely to help people take mitigation actions and reduce the probability of landslides (Becker et al., 2013; Osuret et al., 2016; Webb and Ronan, 2014). In contrast, the latter approach likely reduces people's and assets' perceived vulnerability to risk. However, it does not influence the physical processes. One needs effective landslide risk communication systems (RCSs) to educate people about cause-and-effect relationships concerning landslides (Glade et al., 2005). To be effective, these RCSs should possess five main components (Rogers and Tsirkunov, 2011): monitoring, analysing, risk communication, warning dissemination, and capacity building.

Deleted: Dr. Stefano Luigi Gariano - ... [1]

Formatted: Numbering: Continuous

Deleted: Amount

Formatted: Font:Bold

Formatted: Font:Bold

Formatted: Font:Bold

Formatted: Font:Bold

Deleted: This research work investigates how differing amounts of experiential feedback and feedback's availability in an interactive simulation tool influences people's decision-making against landslide risks.

Deleted: decisions

Deleted: ;

Deleted: amount

Deleted: We

Deleted: amount

Deleted: In an experiment,

Deleted: in

Deleted: ;

Deleted: Experience gained in ILS enables people to improve their decision-making against landslide risks.

Deleted: .

Deleted: &

Deleted: Knowledge about causes-and-consequences of landslides and awareness about landslide disaster mitigation are likely to help people take good mitigation actions that prevent landslides from occurring (Becker, Paton, Johnston, & Ronan et al., 2013; Osuret et al., 2016; Webb & Ronan, 2014). Imparting knowledge about causes-and-consequences as well as spreading awareness about landslide disaster mitigation are two different ways of managing landslide risks. The former supports structural protection measures that reduce the probability of landslides. In contrast, the latter likely reduces people's and assets' perceived vulnerability and it does not influence the physical processes. However, t

Deleted: o

Deleted: concerning landslides, effective landslide risk communication systems (RCSs) or Early Warning systems (EWSs) are needed

Deleted: , Anderson, Crozier

Deleted: 6

Deleted: ISDR, 2004;

Deleted: analyzing

Deleted: ;

Deleted: ;

Deleted: ;

Deleted: ;

76 Among these components, prior research has focused on monitoring and analysing the occurrence of  
77 landslide events (Dai et al., 2002; Montrasio et al., 2011). For example, there exist various statistical and process-  
78 based models for predicting landslides (Dai et al., 2002; Montrasio et al., 2011). Several satellite-based and sensor-  
79 based landslide monitoring systems are being used in landslide RCSs (Hong et al., 2006; Quanshah et al., 2010;  
80 Rogers et al., 2011). To be effective, however, landslide RCSs need not only be based upon sound scientific models,  
81 but, they also need to consider human factors, i.e., the knowledge and understanding of people residing in landslide-  
82 prone areas (Meissen and Voisard, 2008). Thus, there is an urgent need to focus on the development, evaluation, and  
83 improvement of risk communication, warning dissemination, and capacity building measures in RCSs.

84 Improvements in risk communication strategies are likely to help people understand the cause-and-effect  
85 processes concerning landslides and help them improve their decision-making against these natural disasters (Grasso  
86 and Singh, 2009). However, surveys conducted among communities in landslide-prone areas (including those in  
87 northern India) have shown a lack of awareness and understanding among people about landslide risks (Chaturvedi  
88 and Dutt, 2015; Oven, 2009; Wanasolo, 2012). In a survey conducted in Mandi, India, Chaturvedi and Dutt (2015)  
89 found that 60% of people surveyed were not able to answer questions on landslide susceptibilities maps, which were  
90 prepared by experts. Also, Chaturvedi and Dutt (2015) found that a sizeable population reported landslides to be  
91 “acts of God” (39%) and attributed activities like “shifting of temple” as causing landslides (17%). These results are  
92 surprising as the literacy-rate in Mandi and surrounding areas is quite high (81.5%) (Census, 2011) and these results  
93 show numerous misconceptions about landslides among people in landslide-prone areas. Overall, urgent measures  
94 need to be taken that improve public understanding and awareness about landslides in affected areas.

95 Promising recent research has shown that experiential feedback in simulation tools likely helps improve  
96 public understanding about dynamics of physical systems (Chaturvedi et al., 2017; Dutt and Gonzalez, 2010; 2011;  
97 2012; Fischer, 2008). Dutt and Gonzalez (2012) developed a Dynamic Climate Change Simulator (DCCS) tool,  
98 which was based upon a more generic stock-and-flow task (Gonzalez and Dutt, 2011a). The authors provided  
99 frequent feedback on cause-and-effect relationships concerning Earth’s climate in DCCS and this experiential  
100 feedback helped people reduce their climate misconceptions compared to a no-DCCS intervention. Although the  
101 prior literature has investigated the role of frequency of feedback about inputs and outputs in physical systems, yet  
102 little is known on how differing strengths of experiential feedback (i.e., differing probabilities of damages due to  
103 landslides) influences people’s decisions over time. Also, little is known on how experiential feedback’s availability  
104 (presence or absence) in simulation tools influences people’s decisions.

105 The main goal of this paper is to evaluate how differing strengths of experiential feedback and feedback’s  
106 availability influences people’s mitigation decisions. It is important to understand how differing experiential  
107 feedback in terms of differing probabilities of landslide damages influences people’s mitigation decisions. That is  
108 because the experience of landslide consequences could range from no damages to large damages involving several  
109 injuries, infrastructure damages, and deaths. Thus, some people may experience severe damages and consider  
110 landslides to be a serious problem requiring immediate actions, whereas, other people may experience no damages  
111 and consider landslides to be a trivial problem requiring very little attention.

- Deleted: analyzing
- Formatted: Indent: First line: 1.27 cm
- Deleted: s
- Deleted: Application of s
- Deleted:
- Deleted: monitoring for regional landslide monitoring
- Deleted: s
- Deleted: site-specific
- Deleted: is
- Deleted: widely
- Deleted: in use
- Deleted: most of the
- Deleted: early warning systems
- Deleted: ;
- Deleted: 11
- Deleted: &
- Deleted: Also,
- Deleted: as
- Deleted: an
- Deleted: %),
- Deleted: which
- Deleted: s
- Deleted: research is needed
- Deleted: s
- Deleted: and awareness
- Deleted: Dutt, 2011;
- Deleted: &
- Deleted: &
- Deleted: amount
- Deleted: amount
- Deleted: ;

142 In addition, the availability of feedback in simulation tools is also likely to influence people's decisions  
143 against landslides. When feedback is absent, people are likely only to acquire descriptive knowledge about the  
144 cause-and-effect relationships governing the landslide dynamics (Dutt and Gonzalez, 2010). However, when  
145 feedback is present, people get to repeatedly experience the positive or negative consequences of their decisions  
146 against landslide risks (Dutt and Gonzalez, 2010; 2011). This repeated experience will likely help people understand  
147 the cause-and-effect relationships governing the landslide dynamics.

148 Chaturvedi et al. (2017) proposed a computer-simulation tool, called the Interactive Landslide Simulator  
149 (ILS). The ILS tool is based upon a landslide model that considers the influence of both human factors and physical  
150 factors on landslide dynamics. Thus, in ILS, both physical factors (e.g., spatial geology and rainfall) and human  
151 factors (e.g., monetary contributions to mitigate landslides) influence the probability of catastrophic landslides. In a  
152 preliminary investigation involving the ILS tool, Chaturvedi et al. (2017) varied the probability of damages due to  
153 landslides at two levels: low probability and high probability. The high probability was set about 10-times higher  
154 compared to the low probability. People were asked to make monetary investment decisions, where the monetary  
155 payment would be used for mitigating landslides (e.g., by building a retaining wall or by planting crops with long  
156 roots in landslide-prone areas). People's investments were significantly greater when the damage probability was  
157 high compared to when this probability was low. However, Chaturvedi et al. (2017) did not fully evaluate the  
158 effectiveness of experiential feedback of damages in ILS tool against control conditions where this experiential  
159 feedback was not present. Also, Chaturvedi et al. (2017) did not investigate people's investment decisions over time  
160 and certain strategies in ILS, where these decisions and strategies would be indicative of learning of landslide  
161 dynamics in the tool.

162 Prior literature on learning from experiential feedback (Baumeister et al., 2007; Dutt and Gonzalez, 2012;  
163 Finucane et al., 2000; Knutty, 2005; Reis and Judd, 2013; Wagner, 2007) suggests that increasing the strength of  
164 damage feedback by increasing the probabilities of landslide damages in simulation tools would likely increase  
165 people's mitigation decisions. That is because a high probability of landslide damages will make people suffer  
166 monetary losses and people would tend to minimize these losses by increasing their mitigation actions over time. It  
167 is also expected that the presence of experiential feedback about damages in simulation tools is likely to increase  
168 people's landslide-mitigation actions over time (Dutt and Gonzalez, 2010; 2011; 2012). That is because the  
169 experiential feedback about damages will likely enable people to make decisions and see the consequences of their  
170 decisions, however, the absence of this feedback will not allow people to observe the consequences of their  
171 decisions once these decisions have been made (Dutt and Gonzalez, 2012). At first glance, these explanations may  
172 seem to assume people to be economically rationale individuals while facing landslide disasters (Bossaerts and  
173 Murawski, 2015; Neumann and Morgenstern, 1947), where one disregards people's bounded rationality, risk  
174 perceptions, attitudes, and behaviours (De Martino, Kumaran, Seymour, and Dolan; 2005; Gigerenzer and Selten,  
175 2002; Kahneman and Tversky, 1979; Simon, 1959; Slovic, Peters, Finucane, and MacGregor, 2005; Thaler and  
176 Sunstein, 2008; Tversky and Kahneman, 1992). However, in this paper, we consider people to be bounded rational  
177 agents (Gigerenzer and Selten, 2002; Simon, 1959), who tend to minimize their losses against landslides slowly over

Deleted: to  
Deleted: &

Deleted: Interactive simulation tools provide a way of evaluating how experiential feedback influences people's decisions (Chaturvedi et al., Arora, & Dutt, 20176).

Formatted: Indent: First line: 1.27 cm

Deleted: , Arora, and Dutt

Deleted: 6

Deleted: .

Deleted: , Arora, and Dutt

Deleted: 6

Deleted: conducted an experiment with human participants to gauge the effectiveness of the ILS tool. The

Deleted: was varied at two levels in ILS

Deleted:

Deleted: , Arora, and Dutt

Deleted: 6

Deleted: , Arora, and Dutt

Deleted: 6

Deleted: overtime

Deleted: are

Formatted: Indent: First line: 1.27 cm

Deleted: &

Deleted: Quigley, Lindquist, Barrett

Deleted: amount

Deleted: (i.e.,

Deleted: )

Deleted: &

Deleted: 1

Deleted: 2a

Deleted: b

Deleted: ;

Deleted: &

Deleted: c

Deleted: a

Deleted: &

Deleted: &

Deleted: &

Deleted: &

Deleted: and

Deleted: &

Deleted: &

Deleted: &

219 time via a trial-and-error learning process driven by personal experience in an uncertain environment (Dutt and  
220 Gonzalez, 2010; Slovic et al., 2005).

Deleted: &

221 In this paper, we evaluate the influence of differing strengths of experiential feedback about landslide-  
222 related damages and the experiential feedback's availability in the ILS tool. More specifically, we test whether  
223 people increase their mitigation actions in the presence of experiential damage feedback compared to in the absence  
224 of this feedback. In addition, we evaluate how different probabilities of damages influence people's mitigation  
225 actions in the ILS tool. Furthermore, we also analyze people's mitigation actions over time across different  
226 conditions.

Deleted: amount

Deleted: analyze

227 In what follows, first, we detail a computational model on landslide risks that considers the role of both  
228 human factors and physical factors. Next, we detail the working of the ILS tool, i.e., based on the landslide model.  
229 Furthermore, we use the ILS tool in an experiment to evaluate the influence of differing strengths of experiential  
230 feedback and feedback's availability on people's decisions. Finally, we close this paper by discussing our results and  
231 detailing the benefits of using tools like ILS for communicating landslide risks in the real world.

Deleted: amount

## 222 2. Computational model of landslide risk

233 Chaturvedi et al. (2017) had proposed a computational model for simulating landslide risks that was based upon the  
234 integration of human and physical factors (see Figure 1). Here, we briefly detail this model and use it in the ILS tool  
235 for our experiment (reported ahead). As seen in Figure 1, the probability of landslides due to human factors in the  
236 ILS tool is adapted from a model suggested by Hasson et al. (2010) (see box 1.1 in Figure 1). In Hasson et al.  
237 (2010)'s model, the probability of a disaster (e.g., landslide) due to human factors (e.g., investment) was a function  
238 of the cumulative monetary contributions made by participants to avert the disaster from the total endowment  
239 available to participants. Thus, investing against the disaster in mitigation measures reduces the probability of the  
240 disaster and not investing in mitigation measures increases the probability of the disaster.<sup>1</sup>

Deleted: .

Deleted:

Deleted: , Arora, and Dutt

Deleted: 6

Deleted: is

Deleted: is

241 Furthermore, in the landslide model, the probability of landslides due to physical (natural) factors (see box  
242 1.2) is a function of the prevailing rainfall conditions and the nature of geology in the area (Mathew et al., 2013).<sup>2</sup>  
243 As shown in Figure 1, the ILS model focuses on calculation of total probability of landslide (due to physical and  
244 human factors) (box 1.3). This total probability of landslide is calculated as a weighted sum of probability of  
245 landslide due to physical factors and probability of landslide due to human factors. Furthermore, the model  
246 simulates different types of damages caused by landslides and their effects on people's earnings (box 1.4).

Deleted:

Formatted: Indent: First line: 1.27 cm

Deleted: Geosciences

Deleted: 5

<sup>1</sup> Although we assume this model to incorporate human mitigation actions in the ILS tool, there may also be other  
model assumptions possible where certain detrimental human actions (e.g., deforestation) may increase the  
probability of landslides or the risk (probability \* consequence) of landslides. We plan to consider these model  
assumptions as part of our future research. In addition, there may be contributions made the national, regional, and  
local governments for providing protection measures against landslides in addition to the investments made by  
people residing in the area. In this paper, however, we restrict our analyses to only people's investments influencing  
landslides. We plan to consider the role of governments as part of our future research.

Deleted: human

<sup>2</sup> We restrict our focus to considering only weather (rainfall)-induced landslides.

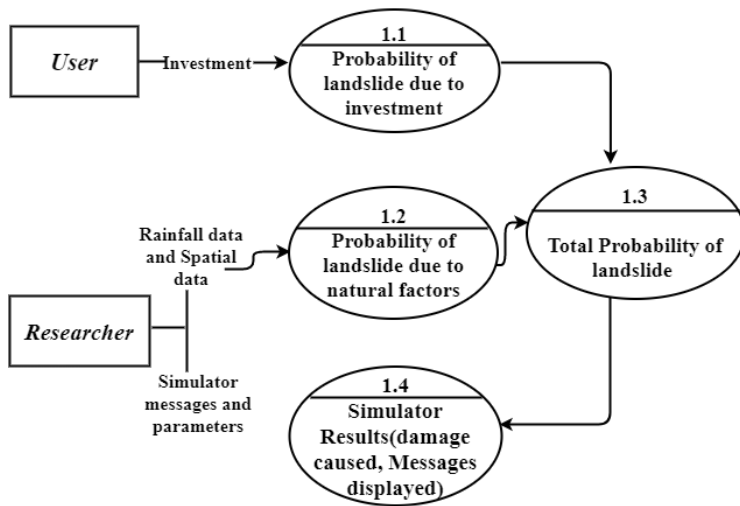

Figure 1. Probabilistic model of the Interactive Landslide Simulator tool. Figure adapted from Chaturvedi et al. (2017).

### 2.1 Total probability of landslides

As described by Chaturvedi et al. (2017), the total probability of landslides is a function of landslide probabilities due to human factors and physical factors. This total probability of landslides can be represented as the following:

$$P(T) = (W * P(I) + (1 - W) * P(E)) \quad (1)$$

Where W is a free weight parameter in [0, 1]. The total probability formula involves calculation of two probabilities, probability of landslide due to human investments ( $P(I)$ ) and probability of landslide due to physical factors ( $P(E)$ ). These probabilities have been defined below. According to Equation 1, the total probability of landslides will change based upon both human decisions and environmental factors over time. A landslide occurs when a uniformly distributed random number ( $\sim U(0, 1)$ ) became less than or equal to  $P(T)$  on a certain day in the ILS tool.<sup>3</sup>

#### 2.1.1 Probability of landslide due to human investments ( $P(I)$ )

As suggested by Chaturvedi et al. (2017), this probability is calculated using the probability model suggested by Hasson et al. (2010). In this model,  $P(I)$  is directly proportional to the amount of money invested by participants for landslide mitigation. The probability of landslide due to human investments is:

$$P(I) = 1 - \frac{M * \sum_{i=1}^n x_i}{n * B} \quad (2)$$

Where,

<sup>3</sup> If a uniformly distributed random number in [0, 1] ( $U(0, 1)$ ) is less than a probability value, then it simulates this probability value. For example, if  $U(0, 1) < 30\%$ , then  $U(0, 1)$  will be less than the 30% value exactly 30% of the total number of times it is simulated and thus this process will simulate a 30% probability value.

Deleted: -

Formatted: Centered

Formatted: Font:Not Bold

Deleted: , Arora, and Dutt

Deleted: 6

Formatted: Font:Not Bold

Deleted: , Arora, and Dutt

Deleted: 6

Deleted: the

Deleted: factor

Deleted: , which is

Deleted: between

Formatted: Font:Italic

Deleted: , Arora, and Dutt

Deleted: 6

Formatted: Font:Not Italic

Formatted: Font:Not Italic

Formatted: Font:Not Italic

288  $B$  = Budget available towards addressing landslides for a day (if a person earns an income or salary, then  $B$  is the  
 289 same as this income or salary earned in a day).  
 290  $n$  = Number of days.  
 291  $x_i$  = Investments made by a person for each day  $i$  to mitigate landslides;  $x_i \leq B$ .  
 292  $M$  = Return to Mitigation, which is a free parameter and captures the lower bound probability of  $P(I)$ , i.e.,  $P(I) = I -$   
 293  $M$  when a person puts her entire budget  $B$  into landslide mitigation ( $\sum_{i=1}^n x_i = n * B$ ),  $0 \leq M \leq 1$ .  
 294 People's monetary investments ( $x_i$ ) are for mitigation measures like building retaining walls or planting long root  
 295 crops.

Deleted:  
 Deleted: <  
 Deleted: <  
 Deleted: .

297 **2.1.2 Probability of landslide due to physical factors ( $P(E)$ )**

298 Some of the physical factors impacting landslides include rainfall, soil type, and slope profile (Chaturvedi et al.,  
 299 2017; Dai et al., 2002). These factors can be categorized into two parts:

Deleted: , Arora, & Dutt  
 Deleted: 6

- 300 1. Probability of landslide due to rainfall ( $P(R)$ )
- 301 2. Probability of landslide due to soil type and slope profile (spatial probability,  $P(S)$ )

302 For the sake of simplicity, we have assumed that spatial probability of landslide is independent of the triggering  
 303 probability of landslide due to rainfall. Given  $P(R)$  and  $P(S)$ , the probability of landslide due to physical factors,  
 304  $P(E)$  is defined as:

$$305 P(E) = P(R) * P(S) \quad (3)$$

306 The methodology adopted here comprises of two steps. In the first step,  $P(R)$  is calculated based upon a logistic-  
 307 regression model (Mathew et al., 2013) as follows:

Deleted: Geosciences, 2015

$$308 P(R) = \frac{1}{1+e^{-z}} \quad (4a)$$

309 And,

$$310 z = -3.817 + (DR) * 0.077 + (3DCR) * 0.058 + (30DAR) * 0.009$$

$$311 z: (-\infty, +\infty) \quad (4b)$$

312 Where, the  $DR$ ,  $3DCR$ , and  $30DAR$  is the daily rainfall, the 3-day cumulative rainfall, and the 30-day antecedent  
 313 rainfall. This model in equations 4a and 4b was developed for the study area by Mathew et al. (2013) and we have  
 314 used the same model in this paper. The rainfall parameters in the model were calculated from the daily rain data  
 315 from the Indian Metrological Department (IMD). Five years of daily rain data (2010-14) from IMD was averaged to  
 316 find the average rainfall values on each day out of the 365 days in a year. Next, these averaged rainfall values were  
 317 put into equations 4a and 4b to generate the landslide probability due to rainfall ( $P(R)$ ) over an entire year. Figure 4  
 318 shows the shape of  $P(R)$  as a function of days in the year for the study area. Given the monsoon period in India  
 319 during July – September, there is a peak in the  $P(R)$  distribution curve during these months. Depending upon the  
 320 start date in the ILS tool, one could read  $P(R)$  values from Figure 2 as the probability of landslides due to rainfall on  
 321 a certain date. This  $P(R)$  function was assumed to possess the same shape across all participants in the ILS tool.

Deleted: These  
 Deleted: are  
 Deleted: determined for a specific geographical location using the  
 historical rainfall data. These rainfall values were  
 Deleted:

Deleted: .In the ILS tool reported ahead,  $P(R)$  is shown  
 Moved (insertion) [1]  
 Deleted: in a certain trial

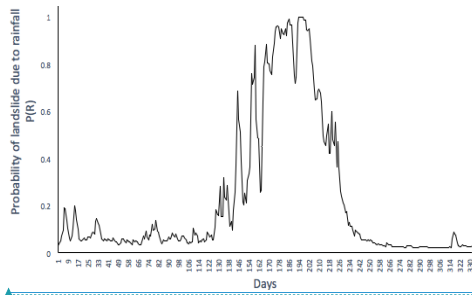

**Figure 2:** Probability of landslide due to rainfall over days for the study area. The probability was generated by using equations 4a and 4b.

The second step is to evaluate the spatial probability of landslides,  $P(S)$ . The determination of  $P(S)$  is done from Landslide Susceptibility Zonation (LSZ) map of the area (Anbalagan, 1992; Chaturvedi et al., 2017; Clerici et al., 2002), which are based on various causative factors for landslides (such as geological, geometry, geomorphological factors) in the study area. The spatial probability is computed based upon the Total Estimated Hazard (THED) rating of different locations on a LSZ map and their surface area of coverage (the maximum possible value of THED is 11.0 and its minimum possible value is 0.0). Table 1 provides the THED scale to report the susceptibility of an area to landslides (Anbalagan, 1992).

Table 1. Total Estimated Hazard (THED) scale for evaluating the susceptibility of an area to landslides

| Hazard Zone | Range of corrected THED  | Description of zone         |
|-------------|--------------------------|-----------------------------|
| I           | $THED < 3.5$             | Very low hazard (VLH) zone  |
| II          | $3.5 < THED < 5.0$       | Low hazard (LH) zone        |
| III         | $5.0 \leq THED \leq 6.5$ | Moderate hazard (MH) zone   |
| IV          | $6.5 < THED \leq 8.0$    | High Hazard (HH) zone       |
| V           | $THED > 8.0$             | Very high hazard (VHH) zone |

First, from Table 1, the critical THED values (e.g., 3.5, 5.0, 6.5, and 8.0) were converted into a probability value by dividing with the highest THED value (= 11.0). Next, we used the LSZ map of the study area to find the surface area that was under a specific THED value and used this area to determine the cumulative probability density function for  $P(S)$ . For example, if a THED of 3.5 has a 20% coverage area on LSZ, then the spatial probability is less than equal to 0.32 ( $=3.5/11.0$ ) with a 20% chance. Similarly, if a THED of 5.0 has a 30% coverage area on LSZ, then the then the spatial probability is less than equal to 0.45 ( $=5.0/11.0$ ) with a 50% chance (30% + 20%). Such calculations enabled us to develop a cumulative density function for  $P(S)$ . In the ILS tool, a participant was assumed to belong to a location in the study area and this study area determined the  $P(S)$  value. This  $P(S)$  value stayed the same for this participant across her performance in the ILS tool.

- Formatted [21]
- Formatted [3]
- Deleted: Graph of p
- Formatted [4]
- Formatted [5]
- Formatted [6]
- Formatted [7]
- Deleted: Once these parameters are determined, equation 4a
- Moved up [1]: In the ILS tool reported ahead,  $P(R)$  is shown
- Deleted:
- Deleted: etc.
- Deleted: Landslide Hazard Map
- Deleted: According to Anbalagan (1992), the spatial probability
- Deleted: This table provides a Total Estimated Hazard (THED)
- Formatted [10]
- Formatted [11]
- Formatted [12]
- Formatted [13]
- Formatted [14]
- Formatted [15]
- Formatted [16]
- Formatted [17]
- Formatted [18]
- Formatted [19]
- Formatted [20]
- Formatted [21]
- Formatted [22]
- Formatted [23]
- Deleted:
- Deleted:
- Formatted [24]
- Formatted [25]
- Formatted [27]
- Deleted:
- Formatted [28]
- Formatted [29]
- Formatted Table [26]
- Formatted [30]
- Formatted [31]
- Formatted [32]
- Formatted [33]
- Deleted: From this table, the spatial probability can be calculated
- Deleted: THED
- Deleted: for spatial probability of landslides
- Formatted [35]
- Formatted [36]
- Formatted [37]
- Deleted: A landslide occurs on a certain day when a independent

394  
 395 **2.1.3 Damages due to landslides**  
 396 As suggested by Chaturvedi et al. (2017), the damages caused by landslides were classified into three independent  
 397 categories: property loss, injury, and fatality. These categories have their own damage probabilities. When a  
 398 landslide occurs, it could be benign or catastrophic. A landslide becomes catastrophic when any of the three  
 399 independent random numbers ( $\sim U(0, 1)$ ) become less than or equal to the corresponding damage probability of  
 400 property loss, injury, and fatality. Once the random number is less than the probability of the corresponding damage,  
 401 the damage occurs. Landslide damages have different effects on the player's wealth and income, where damage to  
 402 property affects one's property wealth and damages concerning injury and fatality affect one's income level. **When**  
 403 **the landslide is benign, then there is no injury, fatality, or damage to property.** **The exact assumptions about damages**  
 404 **are detailed ahead in this manuscript.**

**Deleted:** The second step is to evaluate spatial probability of landslides,  $P(S)$ . The determination of  $P(S)$  is done from Landslide Susceptibility Zonation (LSZ) map of the area (Anbalagan, Chakraborty, & Kohli, 2008; Chaturvedi, Arora, & Dutt, 2016; Clerici, Perego, Tellini, & Vescovi, 2002), which are based on geomorphological factors in the study area (Mandi area in northern India). The spatial probability is computed based upon the Total Estimated Hazard (THED) rating of different locations on a Landslide Hazard Map and their surface area of coverage (the maximum possible value of THED is 11.0). For example, if a THED of 3.5 has a 20% coverage area on LSZ, then the spatial probability is less than equal to 0.32 ( $= 3.5/11$ ) with a 20% chance. Such calculations enable us to develop a cumulative density function for spatial probability of landslides.

**Deleted:** , Arora, and Dutt

**Deleted:** 6

406 **3. Interactive Landslide Simulator (ILS) tool**

407 The ILS tool<sup>4</sup> (Chaturvedi et al., 2017) is a web-based tool and it is based upon the ILS model described above. **The**  
 408 **ILS tool** allows participants to make **repeated** monetary investment decisions for landslide risk-mitigation, observe  
 409 the consequences of their decisions via feedback, and try new investment decisions. This way, ILS helps improve  
 410 people's understanding about the causes and consequences of landslides. **The ILS tool can run for different time**  
 411 **periods, which could be from days to months to years. This feature can be customized in the ILS tool. In this paper,**  
 412 **we have assumed a daily time-scale to make it match the daily probability of landslides computed in equations 4a**  
 413 **and 4b.**

**Formatted:** Normal, No bullets or numbering

**Formatted:** Font:Bold

**Deleted:** 6

**Deleted:** and

**Deleted:** daily

414 **The goal in ILS tool is to maximize one's total wealth,** where this wealth is influenced by one's income,  
 415 property wealth, and losses experienced due to landslides. Landslides and corresponding losses are influenced by  
 416 physical factors (spatial and temporal probabilities of landslides) and human factors (i.e., the past contributions  
 417 made by a **participant** for landslide mitigation). The total wealth may decrease (by damages caused by landslides,  
 418 like injury, death, and property damage) or increase (due to daily income). While interacting with the tool, the  
 419 repeated feedback on the positive or negative consequences of their decisions on their income and property wealth  
 420 enables **participants** to revise their decisions and learn landslide risks and dynamics over time.

**Deleted:** A decision makerparticipant's

**Formatted:** Indent: First line: 1.27 cm

**Deleted:** their

**Deleted:** the

**Deleted:** of the participant

**Deleted:** decision-maker

421 Figure 3 represents graphical user interface of ILS tool's investment screen. On this screen, **participants** are  
 422 asked to make monetary mitigation decisions up to their daily income upper bound (see Box A). The total wealth is  
 423 a sum of income not invested for landslide mitigation, property wealth, and total damages due to landslides (see Box  
 424 B). As shown in Box B, **participants** are also shown the different probabilities of landslide due to human and  
 425 physical factors as well as the probability weight used to combine these probabilities into the total probability.  
 426 Furthermore, as shown in Box C, participants are graphically shown the history of total probability of landslide, total  
 427 income not invested in landslides, and their remaining property wealth across different days.

**Deleted:** decision-maker

**Deleted:** 2

**Deleted:** decision-maker

**Deleted:** decision-maker

428

**Deleted:** -

... [39]

<sup>4</sup> The ILS tool was coded in open-source programming languages PHP and MySQL and it is freely available for use at the following URL: [www.pratik.acslab.org](http://www.pratik.acslab.org)



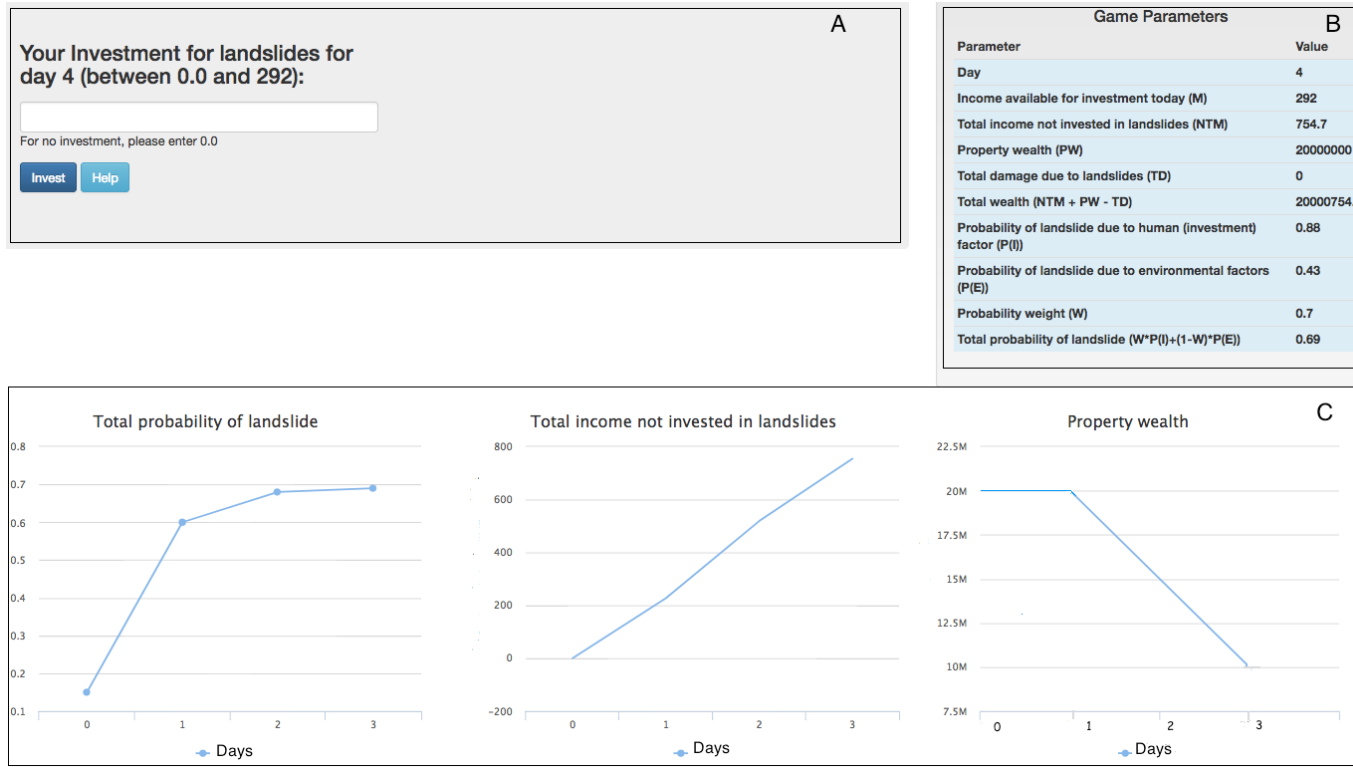

Your Investment for landslides for day 4 (between 0.0 and 292):

For no investment, please enter 0.0

Invest Help

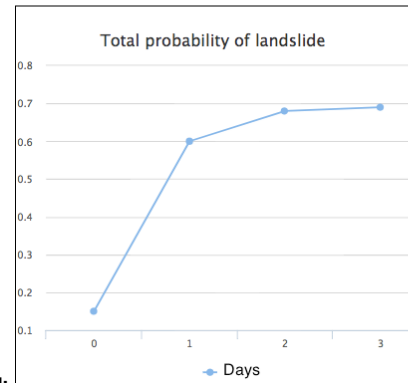

460

461 **Figure 3.** ILS tool's Investment Screen. Box (A): The text box where participants made investments against landslides. Box (B): The tool's different parameters  
 462 and their values. Box (C): Line graphs showing the total probability of landslide, the total income not invested in landslides, and the property wealth over days.  
 463 Horizontal axes in these graphs represents number of days. The goal was to maximize Total Wealth across a number of days of performance in the ILS tool. [This](#)  
 464 [figure is adapted from Chaturvedi et al. \(2017\).](#)

465

- Deleted:
- Deleted: 2
- Formatted: Font:Bold
- Deleted: -

469 As described above, participants, i.e., common people residing in the study area, could invest between zero  
470 (minimum) and player's current daily income (maximum). Once the investment is made, participants need to click  
471 the "Invest" button. Upon clicking the Invest button, participants enter the experiential feedback screen where they  
472 can observe whether a landslide occurred or not and whether there were changes in the daily income, property  
473 wealth, and damages due to the landslide (see Figure 4). As discussed above, the landslide occurrence was  
474 determined by the comparison of a uniformly distributed random number in [0, 1] with  $P(T)$ . If a uniformly  
475 distributed random number in [0, 1] was less than or equal to  $P(T)$ , then a landslide occurred; otherwise, the  
476 landslide did not occur. Furthermore, if the landslide occurred, then three uniformly distributed random numbers in  
477 [0, 1] were compared with the probability of injury, fatality, and property damage, respectively. If the values of any  
478 of these random numbers were less than or equal to the corresponding injury, fatality, or property-damage  
479 probabilities, then the landslide was catastrophic (i.e., causing injury, fatality, or property damage; all three events  
480 could occur simultaneously). In contrast, if the random numbers were more than the corresponding injury, fatality,  
481 and property-damage probabilities, then the landslide was benign (i.e., it did not cause injury, fatality, and property  
482 damage). As shown in Figure 4(A), feedback information is presented in three formats: monetary information about  
483 total wealth (box I), messages about different losses (box I), and imagery corresponding to losses (box II). Injury  
484 and fatality due to landslides causes a decrease in the daily income and damage to property causes a loss of property  
485 wealth (the exact loss proportions are detailed ahead). If a landslide does not occur in a certain trial, a positive  
486 feedback screen is shown to the decision maker (see Figure 4(B)). The user can get back to investment decision  
487 screen by clicking on "Return to Game" button on the feedback screen.

488

489

(A) Negative Feedback

- Deleted: a
- Deleted: decision-maker
- Deleted: can
- Deleted: the
- Deleted: decision-maker
- Deleted: s
- Deleted: and
- Deleted:
- Deleted: 3
- Formatted: Font:Italic
- Formatted: Font:Italic

- Deleted:
- Deleted: 3

- Deleted: 3

- Formatted: Indent: Left: 0 cm

## ⚠️ Landslide Occurred!

You made **56** investment.

I

**Your friend invested: 161**

Fortunately, no one in your family died.

Thus, your daily income was not affected and stays at the same value.

Fortunately, no one in your family was injured.

Thus, your daily income was not affected and stays at the same value.

Sorry, your house was destroyed by the debris. Total damage occurred is **10000000**.

Thus, your property wealth is **10000000**.

Your total wealth is **10000631.4**.

II

Return To Game

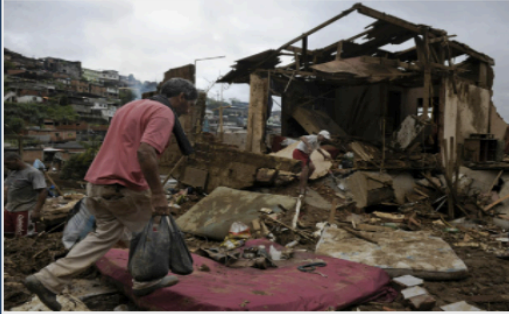

Deleted: .

502

503

504

(B) Positive Feedback

Deleted: <sp>

Formatted: Indent: Left: 0 cm

Formatted: Justified

## 😊 Landslide did not Occur!

You made **180** investment.

**Your friend invested: 172**

Thus, your income stays at **262.8**.

Thus, your property wealth stays at **5000000**.

Your total wealth is **5000777**.

Return To Game

505

508 **Figure 4.** ILS tool's feedback screens. **(A)** Negative feedback when a landslide occurred. Box (I) contains the loss in  
509 terms of magnitude and messages and Box (II) contains associated imagery. **(B)** Positive feedback when a landslide  
510 did not occur.

#### 513 4 Methods

514 To test the effectiveness of strength and availability of feedback, we performed a laboratory experiment involving  
515 human participants where we compared performance in the ILS tool in the presence or absence of experiential  
516 feedback about different damage probabilities. Based upon prior literature (Baumeister et al., 2007; Dutt and  
517 Gonzalez, 2012; Finucane et al., 2000; Knutty, 2005; Reis and Judd, 2013; Wagner, 2007), we expected the  
518 proportion of investments to be higher in the presence of experiential feedback compared to those in the absence of  
519 experiential feedback. Furthermore, we expected higher investments against landslides when feedback was more  
520 damaging in ILS compared to when it was less damaging (Chaturvedi et al., 2017; Dutt and Gonzalez, 2011;  
521 Gonzalez and Dutt, 2011a).

#### 523 4.1 Experimental Design

524 Eighty-three participants were randomly assigned across four between-subjects conditions in the ILS tool, where the  
525 conditions differed in the strength of experiential feedback (high-damage (N= 40) or low-damage (N= 43)) and  
526 availability of feedback (feedback-present (N= 43) or feedback-absent (N= 40)) provided after every mitigation  
527 decision.<sup>5</sup> They were asked to invest repeatedly against landslides across 30-days. In feedback-present conditions,  
528 participants made investment decisions on the investment screen and then they received feedback about the  
529 occurrence of landslides or not on the feedback screen. Participants were also provided graphical displays showing  
530 the total probability of landslides, the total income not invested in landslides, and the property wealth over days.  
531 Figures 3 and 4 show the investment and feedback screen that were shown to participants in the feedback-present  
532 conditions. In feedback-absent conditions, participants were given a text description and they made an investment  
533 decision, however, neither they were shown the feedback screen nor they were shown the graphical displays on the  
534 investment screen. Thus, in the feedback-absent condition, although participants were provided with the probability  
535 of damages due to landslides and the results of 0% and 100% investments as a text description, however, they were  
536 not shown the feedback screen as well as the graphical displays on the investment screen. Figures 5A and 5B show  
537 the text description and investment screen (without graphical displays) shown to participants in the feedback-absent  
538 conditions. In high-damage conditions, the probability of property damage, fatality and injury on any trial were set  
539 at 30%, 9%, and 90%, respectively, over 30-days. In low-damage conditions, the probability of property damage,  
540 fatality and injury on any trial were set at 3%, 1%, and 10%, respectively, over 30-days (i.e., about 1/10<sup>th</sup> of its  
541 values in the high-damage condition). Across all conditions, participants made one investment decision per trial  
542 across 30-days (this end-point was unknown to participants). Participants' goal was to maximize their total wealth

<sup>5</sup> An experiment involving the high-damage feed-present condition (N = 20) and the low-damage feedback-present condition (N = 23) in the ILS tool was reported by Chaturvedi et al. (2017). This data has been included in this paper with two more conditions, the high-damage feedback-absent (N = 20) and the low-damage feedback-absent (N = 20). Data in all four conditions was collected simultaneously.

- Deleted: 3
- Formatted: Font:Bold
- Formatted: Font:Bold
- Deleted: .
- Formatted: Font:Bold
- Formatted: Font:Bold
- Deleted: Experiment
- Formatted: Font:Bold
- Formatted: Normal, No bullets or numbering
- Deleted: amount
- Deleted: &
- Deleted: Quigley et al.,
- Deleted: 6
- Deleted: &
- Deleted: &
- Deleted: 3
- Deleted:
- Deleted: amount
- Deleted: performed in the ILS tool, where they
- Deleted: experiential
- Deleted: after each investment decision
- Deleted: (see Figure 3 and 42)
- Deleted: again performed in the ILS tool
- Deleted: ;
- Deleted: did not receive
- Deleted: experiential feedback after each investment decision
- Deleted: (see Figure 54)
- Deleted: ;
- Deleted: there was no
- Deleted: to provide experiential feedback to participants
- Deleted: r

567 over 30-days. Across all conditions, only 1-landslide could occur on a particular day. The nature of functional forms  
568 used for calculating different probabilities in ILS were unknown to participants.

569 The proportion of damage (in terms of daily income and property wealth) that occurred in an event of  
570 fatality, injury, or property damage was kept constant across 30-days. The property wealth decreased to half of its  
571 value every time property damage occurred in an event of a landslide. The daily income was reduced by 10% of its  
572 latest value due to a landslide-induced injury and 20% of its latest value due to a landslide-induced fatality. The  
573 initial property wealth was fixed to 20 million EC<sup>6</sup>, which is the expected property wealth in Mandi area. The initial  
574 per-trial income was kept at 292 EC (taking into account the GDP and per-capita income of Himachal state where  
575 Mandi is located). Overall, there was a large difference between the initial income earned by a participant and the  
576 participant's initial property wealth. In this scenario, the optimal strategy dictates participants to invest their entire  
577 income in landslide protection measures, since participants' goal was to maximize total wealth. The weight (W)  
578 parameter in the equation 1 of the ILS model was fixed at 0.7 across all conditions. The value of the W parameter  
579 ensured that participants' investment decisions played a dominant role in influencing the total landslide probability.  
580 Also, the value of the W parameter was shown to participants through the investment screen on the ILS tool's  
581 interface (see Figures 3 and 5). Furthermore, the return to mitigation free parameter (M) was set at 0.8. Again the  
582 value of the M parameter ensured that probability of landslides reduced to 20% when participants invested their  
583 daily income in full. Participants performed in the ILS for 30-days, starting in mid-July and ending in mid-August.  
584 This period coincided with the period of heavy monsoon rainfall in Mandi area. Thus, participants performing in ILS  
585 experienced an increasing probability of landslides due to environmental factors (due to increasing amount of  
586 rainfall overtime). We used the investment ratio as a dependent variable for the purpose of data analyses.

587 The investment ratio was defined as the ratio of investment made in a trial to total investment that could  
588 have been made up to the same trial. This investment ratio was averaged across all participants in one case and  
589 averaged over all participants and days in another case. We expected the average investment ratio to be higher in the  
590 feedback-present and high-damage conditions compared to feedback-absent and low-damage conditions. We took an  
591 alpha-level (the probability of rejecting the null hypothesis when it is true) to be 0.05 (or 5%).

592

Formatted: Indent: First line: 1.27 cm

Deleted: Weight

Deleted: (

Deleted: )

Deleted: 8

Deleted: value

Deleted: kn

Deleted: on

Deleted: graphical user

Deleted: 2

Deleted: 4

Deleted:

Deleted: -

Formatted: Centered, Line spacing: 1.5 lines

<sup>6</sup> To avoid the effects of currency units on people's decisions, we converted Indian National Rupees (INR) to a fictitious currency called "Electronic Currency (EC)," where 1 EC = 1 INR.

605

606

**Instructions**

Welcome! You are a resident of Mandi district of Himachal Pradesh, India, a township in the lap of Himalayas. You live in an area that is highly prone to landslides due to several environmental factors (e.g., the prevailing geological conditions and rainfall). During the monsoon season, due to high intensity and prolonged period of rainfall, landslides may occur in the Mandi district. These landslides may cause fatalities and injuries to you, your family, and to your friends, who reside in the same area. In addition, landslides may also damage your property and cause loss to your property wealth.

In this task, you will be repeatedly making daily investment decisions to mitigate landslides over a period of several days. We use a fictitious currency called "EC". Every day, you earn 292 EC. This money is your daily income and you may use a part or whole of it for making investments against landslides. Your investments will be used to provide landslide mitigation measures like planting trees and building reinforcements, both of which prevent landslides from occurring. Every day, you may decide to invest a certain monetary amount from your income towards landslide mitigation; however, you may also decide not to invest anything on a day (in which case, you invest 0.0 against landslides).

**Your total wealth at any point in the game is the following: sum of the amounts you did not invest against landslides across days + your property wealth - damages to you, your family, your friends, and to your property due to landslides.** Your property wealth is assumed to be 20 million EC at the start of the task. **The income invested against landslides is lost and it cannot contribute to the total wealth. Your goal in this task is to maximize your total wealth.**

Generally, landslides are triggered by two main factors: environmental factors (e.g., rainfall; outside one's control) and investment factors (money invested against landslides; within one's own control). The total probability of landslide =  $0.2 * \text{probability of landslide due to environment factors} + 0.8 * \text{probability of landslide due to investment factors}$ .

Whenever a landslide occurs, if it causes fatality, then your daily earnings will be reduced by 5% of its value. If landslide causes injury to you or your family member, then your daily earnings will be reduced by 2.5% of its value. Furthermore, if a landslide occurs and it causes property damage, then your property wealth will be reduced by 80% of its value; however, the money available to you to invest against landslides due to your daily earnings will remain unaffected.

If the probability of property damage, fatality, and injury due to landslides were 30%, 9%, and 90%, respectively, then the damages due to landslides were 197 million EC with 0 EC per day investment and 114 million EC with 292 EC per day investment.

607

608

609

610

611

612

613

614

615

616

617

618

619

620

621

622

623

**Your Investment for landslides for day 1 (between 0.0 and 292):**

For no investment, please enter 0.0

**Figure 5.** The ILS tool in the feedback-absent condition. Participants were tasked to enter across 30-days how much out of 292 EC they were willing to contribute against landslides. The task was similar in the high-damage feedback-absent condition, however, the damage percentages in the last paragraph were 30%, 9%, and 90%, respectively. (A) Instructions given to participants. (B) Investment screen (without graphical displays).

**Formatted:** Font:Bold  
**Formatted:** Normal, No bullets or numbering

**Deleted:** <sp>  
**Instructions**

Welcome! You are a resident of Chamoli district of Uttarakha of Himalayas. You live in an area that is highly prone to lands factors (e.g., the prevailing geological conditions and rainfall high intensity and prolonged period of rainfall, landslides ma landslides may cause fatalities and injuries to you, your fami the same area. In addition, landslides may also damage your property wealth.

In this task, you will be repeatedly making daily investment c period of several days. We use a fictitious currency called "E money is your daily income and you may use a part or whole landslides. Your investments will be used to provide landslid trees and building reinforcements, both of which prevent lan you may decide to invest a certain monetary amount from yi mitigation; however, you may also decide not to invest anyth invest 0.0 against landslides).

**Your total wealth at any point in the game is the following: s against landslides across days + your property wealth - dam and to your property due to landslides.** Your property wealth start of the task. **The income invested against landslides is l total wealth. Your goal in this task is to maximize your total**

Generally, landslides are triggered by two main factors: envi outside one's control) and investment factors (money invest own control). The total probability of landslide =  $0.2 * \text{probab factors} + 0.8 * \text{probability of landslide due to investment fac}$

Whenever a landslide occurs, if it causes fatality, then your c of its value. If landslide causes injury to you or your family m be reduced by 2.5% of its value. Furthermore, if a landslide c damage, then your property wealth will be reduced by 80% i available to you to invest against landslides due to your daily

If the probability of property damage, fatality, and injury due respectively, then the damages due to landslides were 63 m and 15 million EC with 292 EC per day investment.

**Deleted:** ... [40]

**Formatted:** Font:Bold

**Formatted:** Centered

**Formatted:** Centered

**Deleted:** 4

**Formatted:** Font:Bold

**Formatted:** Font:Bold

**Formatted:** Font:Not Bold

**Formatted:** Font:Not Bold

**Formatted:** Font:Not Bold

**Deleted:** The ILS tool in the feedback-absent condition.

Participants were tasked to enter across 30-days how much out of 292 EC they were willing to contribute against landslides. The task was similar in the high-damage feedback-absent condition; howe ... [41]

639 **4.2 Participants**

640 Participants were recruited from Mandi area via an online advertisement. The research was approved by the Ethics  
641 Committee at Indian Institute of Technology Mandi. Informed consent was obtained from each participant and  
642 participation was completely voluntary. All participants were from Science, Technology, Engineering, and  
643 Mathematics (STEM) backgrounds and their ages ranged in between 21 and 28 years (Mean = 22 years; Standard  
644 Deviation = 2.19 years). The following percentage of participants were pursuing or had completed different degrees:  
645 6.0% high-school degrees; 54.3% undergraduate degrees; 33.7% Master's degrees; and, 6.0% Ph.D. degrees. [The  
646 Mandi area is prone to landslides and most participants self-reported to be knowledgeable or possess basic  
647 understanding about landslides. The literacy rate in Mandi and surrounding area is quite high \(81.5%\) \(Census,  
648 2011\) and our sample was representative of the population residing in this area.](#) When asked about their previous  
649 knowledge about landslides, 2.4% claimed to be highly knowledgeable, 16.8% claimed to be knowledgeable, 57.8%  
650 claimed to have basic understanding, 18.2% claimed to have little understanding, and 4.8% claimed to have no idea.  
651 All participants received a base payment of INR 50 (~ USD 1). In addition, there was a performance incentive based  
652 upon a lucky draw. Top-10 performing participants based upon total wealth remaining at the end of the study were  
653 put in a lucky draw and one of the participants was randomly selected and awarded a cash prize of INR 500.  
654 Participants were told about this performance incentive before they started their experiment.

Deleted: 3

Deleted:

656 **4.3 Procedure**

657 Experimental sessions were about 30-minutes long per participant. Participants were given instructions on the  
658 computer screen and were encouraged to ask questions before starting their study. Once participants had finished  
659 their study, they were asked questions related to what information and decision strategy they used on the investment  
660 screen and the feedback screen to make their decisions. Once participants ended their study, they were thanked and  
661 paid for their participation.

Deleted: 3

Deleted:

Deleted: Participants were recruited via an online advertisement.

Deleted: (See Appendix "A" for text of instructions used)

663 **5 Results**

664 **5.1 Investment Ratio Across Conditions**

665 The data were subjected to a  $2 \times 2$  repeated-measures analysis of variance. As shown in Figure 6A, there was a  
666 significant main effect of feedback's availability: the average investment ratio was higher in feedback-present  
667 conditions (0.53) compared to that in feedback-absent conditions (0.37) ( $F(1, 79) = 8.86, p < 0.01, \eta^2 = 0.10$ )<sup>7</sup>. [The  
668 bracket values are indicative of the F-value, its significance and effect size.](#) This result is as per our expectation and  
669 shows that the presence of experiential feedback in ILS tool helped participants increase their investments against  
670 landslides compared to investments in the absence of this feedback.

Deleted: 4.

Deleted:

Deleted: 4

Deleted: 5

<sup>7</sup> We performed analysis of variance statistical tests for evaluating our expectations. The F-statistics is the ratio of between-group variance and the within-group variance. The numbers in brackets after the F-statistics are the degrees of freedom (K-1, N - K), where K are the total number of groups compared and N is the overall sample size. The p-value indicates the evidence in favor of the null-hypothesis when it is true. We reject the null-hypothesis when p-value is less than the alpha-level (0.05). The  $\eta^2$  is the proportion of variance associated with one or more main effects. It is a number between 0 and 1 and a value of 0.02, 0.13, and 0.26 measures a small, medium, or large correlation between the dependent and independent variables given a population size.

As shown in Figure 6B, there was a significant main-effect of strength of feedback: the average investment ratio was significantly higher in high-damage conditions (0.51) compared to that in low-damage conditions (0.38) ( $F(1, 79) = 5.46, p < 0.05, \eta^2 = 0.07$ ). Again, this result is as per our expectation and shows that high-damaging feedback helped participants increase their investments against landslides compared low-damaging feedback.

Furthermore, as shown in Figure 6C, the interaction between the strength of feedback and feedback's availability was significant ( $F(1, 79) = 8.98, p < 0.01, \eta^2 = 0.10$ ). There was no difference in the investment ratio between the high-damage condition (0.35) and low-damage condition (0.38) when experiential feedback in ILS was absent, however, the investment ratio was much higher in the high-damage condition (0.67) compared to the low-damage condition (0.38) when experiential feedback in ILS was present (Chaturvedi et al., 2017). Thus, feedback needed to be damaging in ILS to cause an increase in investments in mitigation measures against landslides.

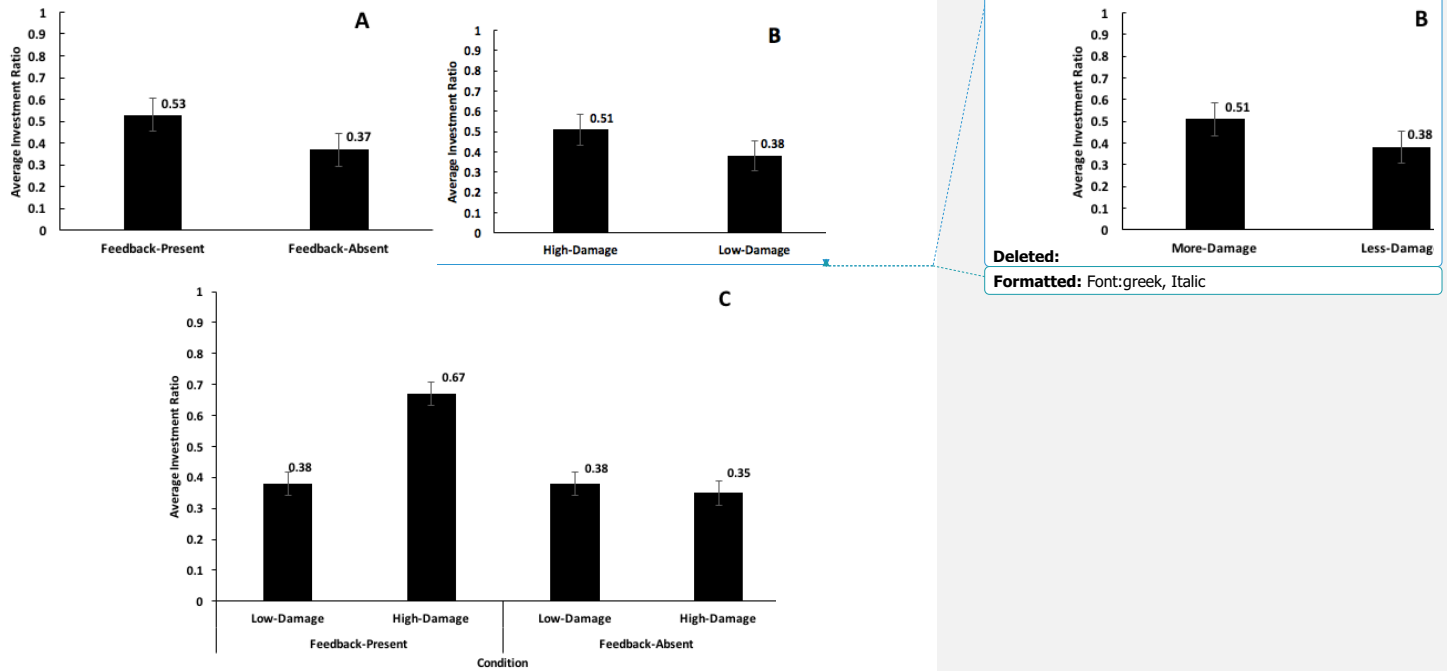

**Figure 6.** (A) Average investment ratio in Feedback-present and Feedback-absent conditions. (B) Average investment ratio in low- and high-damage conditions. (C) Average investment ratio in low- and high-damage conditions with Feedback-present and absent. The error bars show 95% Confidence Interval (CI) around the point estimate.

## 5.2 Investment Ratio Across Days

The average investment ratio increased significantly over 30-days (see Figure 7A;  $F(8.18, 646.1) = 8.35, p < 0.001, \eta^2 = 0.10$ ). As shown in Figure 7B, the average investment ratio increased rapidly over 30-days in feedback-present

Formatted: Indent: First line: 1.27 cm

Deleted: 5

Deleted: amount

Formatted: Justified, Indent: First line: 1.27 cm

Deleted: 5

Deleted: amount

Deleted: ;

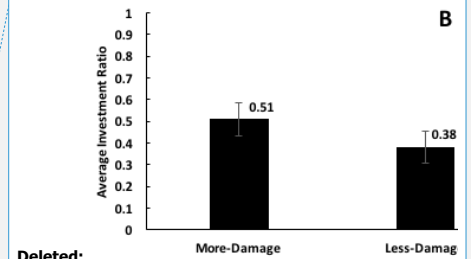

Deleted:

Formatted: Font:greek, Italic

Formatted: Font:Bold

Deleted: 5

Formatted: Font:Bold

Formatted: Font:Bold

Formatted: Font:Bold

Deleted: 4

Formatted: Indent: First line: 0 cm

Deleted: 6

Deleted: 6



712 conditions, however, the increase was marginal in feedback-absent conditions ( $F(8.18, 646.1) = 3.98, p < 0.001, \eta^2$   
713  $= 0.05$ ). Furthermore, in feedback-present conditions, the average investment ratio increased rapidly over 30-days in  
714 high-damage conditions, however, the increase was again marginal in the low-damage conditions (see Figure 7C;  $F$   
715  $(8.18, 646.1) = 6.56, p < 0.001, \eta^2 = 0.08$ ). Lastly, as seen in Figure 7D, although there were differences in the  
716 increase in average investment ratio between low-damage and high-damage conditions when experiential feedback  
717 was present, however, such differences were non-existent between the two damage conditions when experiential  
718 feedback was absent ( $F(8.18, 646.1) = 4.16, p < 0.001, \eta^2 = 0.05$ ). Overall, ILS performance helped participants  
719 increase their investments for mitigating landslides when damage feedback was high compared to low in ILS.  
720

Deleted: ;

Deleted: ;

Deleted: 6

Deleted: 6

Deleted: ;

Deleted: However, in feedback's absence in ILS, participants were unable to increase their investments for mitigating landslides, even when damages were high compared to low. ... [42]

Formatted: Font:Bold

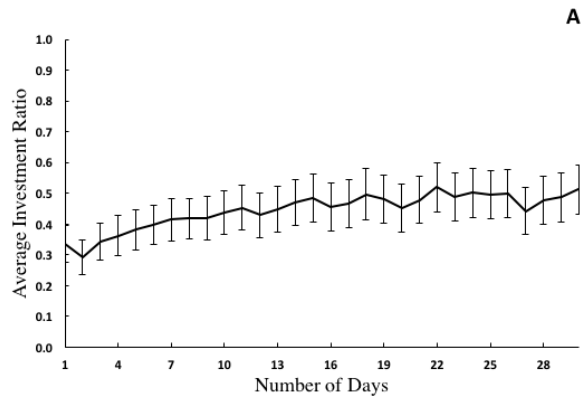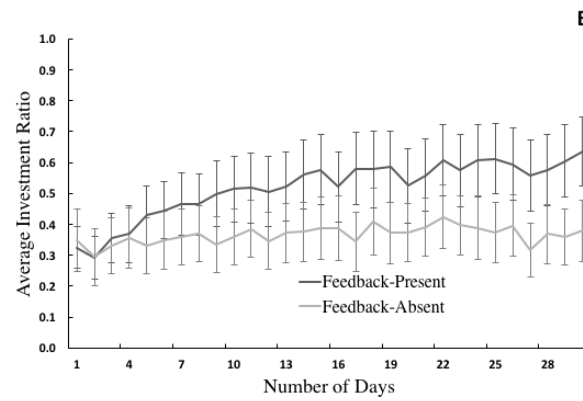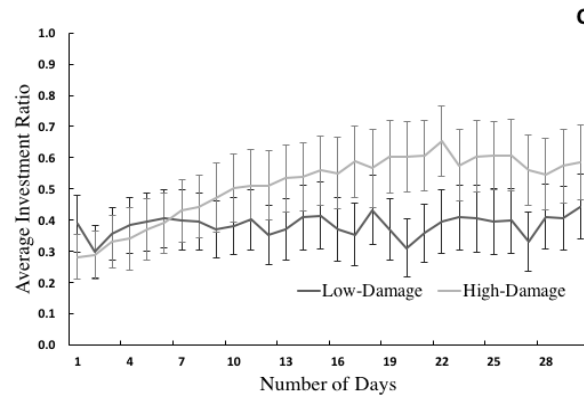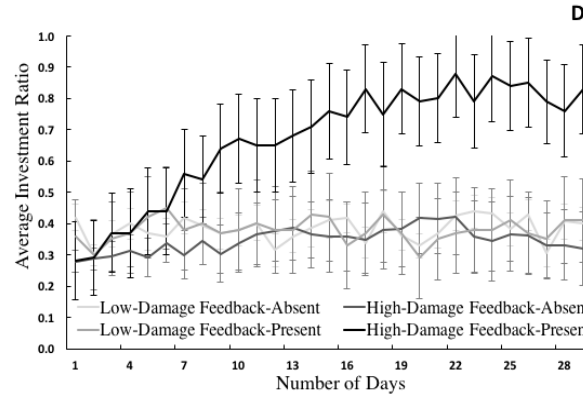

730 **Figure 7.** (A) Average investment ratio over days. (B) Average investment ratio over days in Feedback-present and Feedback-absent conditions. (C) Average  
 731 investment ratio over days in low- and high-damage conditions. (D) Average investment ratio over days in low- and high- damage conditions with Feedback-  
 732 present or absent. The error bars show 95% CI around the point estimate.

Deleted: 6  
 Formatted: Font:Bold  
 Formatted: Font:Bold  
 Formatted: Font:Bold  
 Formatted: Font:Bold  
 Formatted: Font:Bold

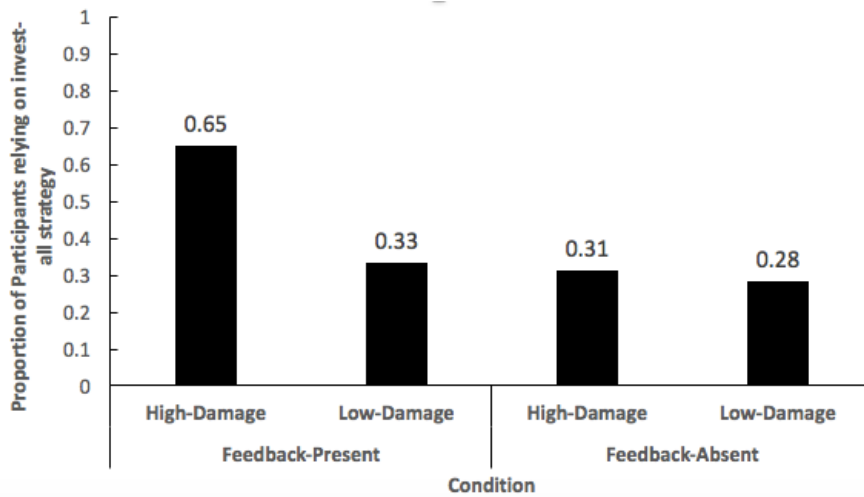

**Figure 8.** The proportion of reliance on the invest-all strategy across different conditions.

Formatted: Numbering: Continuous

Formatted: Font:Bold

Deleted: 7

Formatted: Font:Bold

However, in feedback's absence in ILS, participants were unable to increase their investments for mitigating landslides, even when damages were high compared to low.

### 5.3 Participant Strategies

We analyzed whether an "invest-all" strategy (i.e., investing the entire daily income in mitigating landslides) was reported by participants across different conditions. As mentioned above, the invest-all strategy was an optimal strategy and this strategy's use indicated learning in the ILS tool. Figure 8 shows the proportion of participants reporting the use of the invest-all strategy. Thus, many participants learnt to follow the invest-all strategy in conditions where experiential feedback was present and it was highly damaging compared to participants in the other conditions.

## 6 Discussion and Conclusions

In this paper, we used an existing Interactive Landslide Simulator (ILS) tool for evaluating the effectiveness of feedback in influencing people's decisions against landslide risks. We used the ILS tool in an experiment involving human participants and tested how the strength and availability of experiential feedback in ILS helped increase people's investment decisions against landslides. Our results agree with our expectations: Experience gained in ILS enabled improved understanding of processes governing landslides and helped participants improve their investments against landslides. Given our results, we

Deleted: s

Deleted: amount

Deleted: , including the use of ILS tool itself,

57 believe that ILS could potentially be used as a landslide-education tool for increasing public understanding about landslides.  
 58 The ILS tool can also be used by policymakers to do what-if analyses in different scenarios concerning landslides.

59 First, the high-damaging feedback helped increase people's investments against landslides over time compared to  
 60 the low-damaging feedback. Furthermore, the feedback's presence helped participants increase their investments against  
 61 landslides over time compared to feedback's absence. These results can be explained by the previous lab-based research on  
 62 use of repeated feedback or experience (Chaturvedi et al., 2017; Dutt and Gonzalez, 2010, 2011; Finucane et al., 2000;  
 63 Gonzalez and Dutt, 2011a). Repeated experiential feedback likely enables learning by repeated trial-and-error procedures,  
 64 where bounded-rational individuals (Simon, 1959) try different investment values in ILS and observe their effects on the  
 65 occurrence of landslides and their associated consequences. The negative consequences due to landslides are higher in  
 66 conditions where the damages are more compared to conditions where the damages are less. This difference in landslide  
 67 consequences influences participants' investments against landslides. According to Slovic et al. (2005), loss-averse  
 68 individuals tend to increase their contribution against a risk over time. In our case, similar to Slovic et al. (2005), participants  
 69 started contributing slowly against landslides and, with the experience of landslide losses over time, they started contributing  
 70 larger amounts to reduce landslide risks.

71 We also found that the reliance on invest-all strategy was higher in the high-damage and feedback-present condition  
 72 compared to the low-damage and feedback-absent condition. The invest-all strategy was the optimal strategy in the ILS tool.  
 73 This result shows that participants learned the underlying system dynamics (i.e., how their actions influenced the probability  
 74 of landslides) in ILS better in the feedback-rich condition compared to the feedback-poor condition. As participants were not  
 75 provided with exact equations governing the ILS tool and they had to only learn from trial-and-error feedback, the saliency  
 76 of the feedback due to messages and images likely helped participants' learning in the tool. In fact, we observed that the use  
 77 of the optimal invest-all strategy was maximized when the experiential feedback was highly damaging. One likely reason for  
 78 this observation could be the high educational levels of participants residing in the study area, where the literacy rate was  
 79 more than 80%. Thus, it seems that participants' education levels helped them make the best use of damaging feedback.

80 We believe that the ILS tool can be integrated in teaching courses on landslide sustainable practices in schools from  
 81 kindergarten to standard 12<sup>th</sup>. These courses could make use of the ILS tool and focus on educating students about causes,  
 82 consequences, and risks of hazardous landslides. We believe that the use of ILS tool will make teaching more effective as  
 83 ILS will help incorporate experiential feedback and other factors in teaching in interactive ways. The ILS tool's parameter  
 84 settings could be customized to a certain geographical area over a certain time period of play. In addition, the ILS tool could  
 85 be used to show participants the investment actions other participants (e.g., society or neighbours). The presence of  
 86 investment decisions of opponents in addition to one's own decisions will likely enable social norms to influence people's  
 87 investments and learning in the tool (Schultz et al., 2007). These features makes ILS tool very attractive for landslide  
 88 education in communities in the future.

89 Furthermore, the ILS tool holds a great promise for policy-research against landslides. For example, in future,  
 90 researchers may vary different system-response parameters in ILS (e.g. weight of one's decisions and return to mitigation

**Deleted:** and awareness

**Deleted:** in ILS tool ...elped increase people's investments (... [43])

**Moved (insertion) [2]**

**Deleted:** people who are loss averse,...individuals tend to i (... [44])

**Deleted:** ...amage and feedback-present condition compa (... [45])

**Formatted:** Indent: First line: 0 cm

**Deleted:** . (... [46])

**Formatted:** Superscript

**Deleted:** is...se courses could make use of the ILS tool and (... [47])

54 actions) and feedback (e.g. numbers, text messages and images for damage) in order to study their effects on people's  
 55 decisions against landslides. Here, researchers could evaluate differences in ILS's ability to increase public contributions in  
 56 the face of other system-response parameters and feedback. In addition, researchers can use the ILS tool to do "what-if"  
 57 analyses related to landslides for certain time periods and for certain geographical locations. The ILS tool has the ability to  
 58 be customized to certain geographical area as well as certain time periods, where spatial parameters (e.g., soil type and  
 59 geology) as well as temporal parameters (e.g., daily rainfall) can be defined for the study area. Once the environmental  
 60 factors have been accounted for, the ILS tool enables researchers to account for assumptions on human factors (contribution  
 61 against landslides) with real-world consequences (injury, fatality, and infrastructure damage). Such assumptions may help  
 62 researchers model human decisions in computational cognitive models, which are based upon influential theories of how  
 63 people make decisions from feedback (Dutt and Gonzalez, 2012; Gonzalez and Dutt, 2011b). In summary, these features  
 64 make ILS tool apt for policy research, especially for areas that are prone to landslides. This research will also help test the  
 65 ILS tool and its applicability in different real-world settings.

66 Although the ILS tool causes the use of optimal invest-all strategies among people in conditions where experiential  
 67 feedback is highly damaging, however, more research is needed on investigating the nature of learning that the tool imparts  
 68 among people. As people's investments for mitigating landslides in ILS directly influences the risk of landslides due to  
 69 human and environmental factors, investments indeed have the potential of educating people about landslide risks. Still, it is  
 70 important to investigate how investing money in the ILS tool truly educates people about landslides.

71 Currently, in the ILS model, we have assumed that damages from fatality and injury influence participants' daily  
 72 income levels. The reduced income levels do create adverse consequences, but one could also argue that they would be much  
 73 less of concern for most people compared to the injury and fatality itself. Furthermore, people could also choose to migrate  
 74 from an area when the landslide mitigation cost is too high and adaptation becomes impossible, especially due to the  
 75 differences between the landslide hazard and other hazards such as flood, drought, and general climate risks. As part of our  
 76 future research, we plan to investigate the influence of feedback that causes only injuries or fatalities compared to the  
 77 feedback that causes economic losses due to injuries and fatalities. Also, as part of our future research in the ILS tool, we  
 78 plan to investigate people's migration decisions when the landslide mitigation costs are too high and adaptation to landslides  
 79 is not possible.

80 In the ILS model, we used a linear model to compute the probability of landslides due to human factors. Also, the  
 81 probabilistic equations governing the physical factors in the ILS model were not disclosed to participants, who seemed to  
 82 possess high education levels. One could argue that there are several other linear and non-linear models that could help  
 83 compute the probability of landslides due to human factors. Some of these models could not only influence the probability of  
 84 landslides, but also the severity of consequences (damages) caused by landslides. Also, other generic models could account  
 85 for the physical factors in the ILS tool. We plan to try these possibilities as part of our future work in the ILS tool.  
 86 Specifically, we plan to assume different models of investments in the ILS tool and we plan to test them against participants  
 87 with different education levels.

- Deleted: of interest
- Deleted: we could investigate that
- Deleted: future
- Deleted: should
- Deleted: focus
- Deleted: more deeply about
- Deleted: The ILS tool's parameter settings could be customized to a certain geographical area over a certain time period of play. In addition, the ILS tool could be used to present investment actions of other decision-makers (e.g., society or neighbours) compared to one's own investment actions. The presence of investment of other decision-makers in addition to one's own decisions will likely enable the use of social norms towards learning (Schultz et al., 2007). These features makes ILS tool very attractive for landslide education in communities in the future. (... [48])
- Deleted: Although we could investigate that the ILS tool causes the use of optimal invest-all strategies among people in conditions where experiential feedback is highly damaging; however, future research should focus on investigating more deeply about the nature of learning that the tool imparts among people. As people's investments for mitigating landslides in ILS directly influences the risk of landslides due to human and environmental factors, investments indeed have the potential of educating people about landslide risks. Still, it is important to investigate how investing money in th (... [49])
- Moved up [2]: According to Slovic et al. (2005), people v (... [50])
- Formatted: Font:Not Italic
- Deleted: affect
- Deleted:
- Formatted: Indent: First line: 0 cm
- Deleted: of the participants
- Deleted: We make it all connected to cost.
- Deleted: a
- Deleted: But, a
- Deleted: we will try to find without causing reduction in ir (... [51])
- Deleted:
- Deleted: Another idea is to test whether people would cont (... [52])
- Deleted: This idea is very interesting to study because The (... [53])
- Deleted: urrently,
- Deleted: have
- Deleted: Hasson's
- Deleted: to calculate P(I) to showcase the potential of usin (... [54])
- Deleted: However, as part of
- Deleted: ,
- Deleted: w
- Deleted: will take
- Deleted: we will use them to test on
- Deleted: from different areas

69 In the current experiment, we assumed a large disparity between a participant's property wealth and her daily  
70 income. In addition, as part of the ILS model, we did not consider any support from government or international agencies  
71 against damages from landslides. In certain cases, especially in developing countries, mitigation of landslide risks may often  
72 be financed by government or international agencies. As part of our future work, we plan to extend the ILS model to include  
73 assumptions of contributions from government or international agencies. Such assumptions will help us determine the  
74 willingness of common people to contribute against landslide disasters, which is important as the developing world becomes  
75 developed over time.

Deleted: be

76 To test our hypotheses, we presented participants with a high damage scenario and a low damage scenario, where  
77 the probabilities of property damage, injury, and fatality were high and low, respectively. However, such scenarios may not  
78 be realistic, where people may want to migrate from both low and damage areas in even the least developed countries. In  
79 future research with ILS, we plan to calibrate the probability of damages, injury, and fatality to realistic values and test the  
80 effectiveness of ILS in improving the participants' investment decision making.

Deleted: Another idea is also to model the money financed by government or other sources, we would like to implement this aspect in our future work to improve the robustness of our simulation model. In the current settings of the ILS,

Deleted: have

Deleted: very

Deleted: y

Deleted: which is not

Deleted: will reduce the

Deleted: risk of mortality and

Deleted: the

81 Furthermore, in our experiment, when landslide did not occur and experiential feedback was present, people were  
82 presented with a smiling face followed by a message. The message and emoticon were provided to connect the cause-and-  
83 effect relationships for participants in the ILS tool. However, it could also be that the landslide did not occur on a certain trial  
84 due to the stochasticity in the simulation rather than participants' investment actions. Although such situations are possible  
85 over shorter time-periods, however, over longer time-periods increased investments from people will only reduce the  
86 probability of landslides.

87 In this paper, the experiment used a daily investment setting in the ILS tool. However, the ILS tool can easily be  
88 customized to different time periods ranging from seconds, minutes, hours, days, months, and years. As part of our future  
89 research, we plan to extend the daily assumption by considering people making decisions on longer time scales ranging from  
90 months to years. In addition, in the experiment, we assumed a value of 0.7 and 0.8 for the weight (W) and return to  
91 mitigation (M) parameters. These W and M values indicated that landslide risks could largely be mitigated by human  
92 actions. However, this assumption may not be the case always, especially for mitigation measures like tree plantations. For  
93 example, afforestation alone may not help in reducing deep-seated landslides in hilly areas (Forbes, 2013). Thus, it would be  
94 worthwhile investigating as part of future research on how people's decision-making evolves in conditions where  
95 investments likely influence the landslide probability (higher values of W and M parameters) compared to conditions where  
96 investments unlikely influence the landslide probability (lower values of W and M parameters). Some of these ideas form the  
97 immediate next steps in our ongoing research program on landslide risk communication.

Deleted: To showcase the potential of using ILS in the real-world,

Deleted: the

Deleted: this limitation

Deleted:

Deleted: to

Deleted: e

Deleted: a

Deleted:

Deleted:

Deleted: l

Deleted: it

Deleted: and in

Deleted: do not

Deleted: much

Deleted: i.e. by giving the participants' feeling of helplessness

Deleted: Finally, it is proposed that ILS tool is a promising tool for capturing the decisions of participants against landslide risks and it could be applied with reduced effort to other natural disasters involving human decisions.

29 [Data availability](#). Data used in this article have not been deposited to respect the privacy of users. The data can be provided  
30 to readers upon request.

31 [Author contributions](#). AA designed the website, administered the account, PC wrote the first draft of website articles and  
32 collected data, VD supervised the website contents, AA provided technical support for website maintenance, PC and VD  
33 analysed the data and prepared the manuscript. PC and VD revised the manuscript.

34 [Competing interests](#). The authors declare that they have no conflict of interest.

35  
36  
37 [Acknowledgements](#). This research was partially supported by a grant from Himachal Pradesh State Council for Science,  
38 Technology and Environment to Varun Dutt (grant number: IITM / HPSCSTE / VD / 130). We thank Akanksha Jain and  
39 Sushmita Negi, Centre for Converging Technologies, University of Rajasthan, India for providing preliminary support for  
40 data collection in this project.

41

42

43

44

45

Formatted: Normal

Formatted: Font:Bold, Not Italic, English (US)

Formatted: Normal

46 **References**

47 [Anbalagan, R.:](#) Landslide hazard evaluation and zonation mapping in mountainous terrain, *Eng. Geol.*, 32(4), 269-277,  
48 [doi:10.1016/0013-7952\(92\)90053-2](#), 1992.

49 [Baumeister, R., Vohs, K., and Tice, D.:](#) The Strength Model of Self-Control, *Curr. Dir. Psychol. Sci.*, 16(6), 351-355,  
50 [doi:10.1111/j.1467-8721.2007.00534.x](#), 2007.

51 [Becker, J., Paton, D., Johnston, D., and Ronan, K.:](#) Salient Beliefs About Earthquake Hazards and Household Preparedness,  
52 *Risk Anal.*, 33(9), 1710-1727, [doi:10.1111/risa.12014](#), 2013.

53 [Bossaerts, P. and Murawski, C.:](#) From behavioural economics to neuroeconomics to decision neuroscience: the ascent of  
54 [biology in research on human decision making](#), *Curr. Opin. Behav. Sci.*, 5, pp.37-42, 2015.

55 [Chaturvedi, P., Dutt, V., Jaiswal, B., Tyagi, N., Sharma, S., Mishra, S., Dhar, S., and Joglekar, P.:](#) Remote Sensing Based  
56 [Regional Landslide Risk Assessment](#), *Int. J. Emerg. Tr. Electr. Electron.*, 10(10), 135-140, 2014.

57 [Chaturvedi, P. and Dutt, V.:](#) Evaluating the Public Perceptions of Landslide Risks in the Himalayan Mandi Town, in:  
58 [Proceedings of the Human Factors and Ergonomics Society Annual Meeting, Los Angeles, USA, 26–30 October](#)  
59 [2015](#), 1491-1495, 2015.

60 [Chaturvedi, P., Arora, A., and Dutt, V.:](#) Interactive Landslide Simulator: A Tool for Landslide Risk Assessment and  
61 [Communication](#), in: *Advances in Applied Digital Human Modeling and Simulation, AISC Reprint Series, 481*,  
62 [Springer, Cham, Switzerland](#), 231-243, 2017.

63 [Clerici, A., Perego, S., Tellini, C., and Vescovi, P.:](#) A procedure for landslide susceptibility zonation by the conditional  
64 [analysis method](#), *Geomorphology*, 48(4), 349-364, [doi:10.1016/s0169-555x\(02\)00079-x](#), 2002.

65 [Dai, F., Lee, C., and Ngai, Y.:](#) Landslide risk assessment and management: an overview, *Eng. Geol.*, 64(1), 65-87,  
66 [doi:10.1016/s0013-7952\(01\)00093-x](#), 2002.

67 [De Martino, B., Kumaran, D., Seymour, B. and Dolan, R.J.:](#) Frames, biases, and rational decision-making in the human  
68 [brain](#), *Science*, 313(5787), pp.684-687, 2006.

69 [Dutt, V. and Gonzalez, C.:](#) Why Do We Want to Delay Actions on Climate Change? Effects of Probability and Timing of  
70 [Climate Consequences](#), *J. Behav. Decis. Making*, 25(2), 154-164, [doi:10.1002/bdm.721](#), 2010.

71 [Dutt, V. and Gonzalez, C.:](#) Human control of climate change, *Climatic Change*, 111(3-4), 497-518, [doi:10.1007/s10584-](#)  
72 [011-0202-x](#), 2011.

73 [Dutt, V. and Gonzalez, C.:](#) Decisions from experience reduce misconceptions about climate change, *J. Environ. Psych.*,  
74 [32\(1\)](#), 19-29, [doi:10.1016/j.jenvp.2011.10.003](#), 2012.

75 [Fischer, C.:](#) Feedback on household electricity consumption: a tool for saving energy? *Energ. Effic.*, 1(1), 79-104,  
76 [doi:10.1007/s12053-008-9009-7](#), 2008.

77 [Finucane, M., Alhakami, A., Slovic, P., and Johnson, S.:](#) The affect heuristic in judgments of risks and benefits, *J. Behav.*  
78 [Decis. Making, 13\(1\), 1-17, \[doi:10.1002/\\(sici\\)1099-0771\\(200001/03\\)13:1<1::aid-bdm333>3.0.co;2-s\]\(#\), 2000.](#)

|                                                                                                                                                                                                                                                                                                    |          |
|----------------------------------------------------------------------------------------------------------------------------------------------------------------------------------------------------------------------------------------------------------------------------------------------------|----------|
| <b>Deleted:</b> Acknowledgements -                                                                                                                                                                                                                                                                 | ... [55] |
| <b>Formatted:</b> Font:Italic                                                                                                                                                                                                                                                                      |          |
| <b>Formatted:</b> Font:Not Bold, Italic                                                                                                                                                                                                                                                            |          |
| <b>Deleted:</b> Anbalagan, R., Chakraborty, D., & Kohli, A. (2008). Landslide hazard zonation (LHZ) mapping on meso-scale for systematic town planning in mountainous terrain. <i>Journal of Scientific and Industrial Research</i> , 67, 486-497. -                                               |          |
| <b>Formatted:</b> Indent: First line: 1.27 cm                                                                                                                                                                                                                                                      |          |
| <b>Deleted:</b> Baumeister, R. F., Vohs, K. D., & Tice, D. M. (2007). The strength model of self-control. <i>Current directions in psychological science</i> , 16(6), 351-355. -                                                                                                                   |          |
| <b>Deleted:</b> Becker, J. S., Paton, D., Johnston, D. M., & Ronan, K. (2013). Salient beliefs about earthquake hazards and household preparedness. <i>Risk Analysis</i> , 33(9), 1710-1727. <a href="#">doi:10.1111/risa.12014</a> , 2013. -                                                      | ... [56] |
| <b>Formatted:</b> Indent: First line: 1.27 cm                                                                                                                                                                                                                                                      |          |
| <b>Deleted:</b> Available at:                                                                                                                                                                                                                                                                      | ... [57] |
| <b>Deleted:</b> Chaturvedi P., Dutt V., Jaiswal B., Tyagi N., Sharma S., Mishra S., Dhar S., and Joglekar P. (2014). Remote sensing based regional landslide risk assessment. <i>International Journal of Emerging Trends in Electrical and Electronics Engineering</i> , 10(10), 135-140, 2014. - | ... [58] |
| <b>Formatted:</b> Indent: First line: 1.27 cm                                                                                                                                                                                                                                                      |          |
| <b>Deleted:</b> Chaturvedi, P., & Dutt, V. (2015). Evaluating the public perceptions of landslide risks in the Himalayan Mandi town. In: <i>Proceedings of the Human Factors and Ergonomics Society Annual Meeting, Los Angeles, USA, 26-30 October 2015</i> , 1491-1495, 2015. -                  | ... [59] |
| <b>Deleted:</b> &                                                                                                                                                                                                                                                                                  |          |
| <b>Deleted:</b> (2016).                                                                                                                                                                                                                                                                            |          |
| <b>Deleted:</b>                                                                                                                                                                                                                                                                                    |          |
| <b>Deleted:</b>                                                                                                                                                                                                                                                                                    |          |
| <b>Formatted:</b> Indent: First line: 1.27 cm                                                                                                                                                                                                                                                      |          |
| <b>Deleted:</b> .                                                                                                                                                                                                                                                                                  |          |
| <b>Deleted:</b> I                                                                                                                                                                                                                                                                                  |          |
| <b>Formatted:</b> Default Paragraph Font, English (UK)                                                                                                                                                                                                                                             |          |
| <b>Deleted:</b> (pp. 231-243). Springer International Publishing                                                                                                                                                                                                                                   |          |
| <b>Formatted:</b> Indent: Left: 1.27 cm                                                                                                                                                                                                                                                            |          |
| <b>Deleted:</b> .                                                                                                                                                                                                                                                                                  |          |
| <b>Deleted:</b> -                                                                                                                                                                                                                                                                                  |          |
| <b>Deleted:</b> Clerici, A., Perego, S., Tellini, C., & Vescovi, P. (2002). A procedure for landslide susceptibility zonation by the conditional analysis method. <i>Geomorphology</i> , 48(4), 349-364. <a href="#">doi:10.1016/s0169-555x(02)00079-x</a> , 2002. -                               | ... [60] |
| <b>Formatted:</b> Indent: First line: 1.27 cm                                                                                                                                                                                                                                                      |          |
| <b>Deleted:</b> -                                                                                                                                                                                                                                                                                  |          |
| <b>Formatted:</b> Indent: Left: 0 cm, Hanging: 1.27 cm                                                                                                                                                                                                                                             |          |
| <b>Deleted:</b>                                                                                                                                                                                                                                                                                    |          |
| <b>Formatted:</b> Font:Not Italic                                                                                                                                                                                                                                                                  |          |
| <b>Formatted:</b> Font:Not Italic                                                                                                                                                                                                                                                                  |          |
| <b>Deleted:</b> Dai, F. C., Lee, C. F., & Ngai, Y. Y. (2002). Landslide risk assessment and management: an overview. <i>Engineering Geology</i> , 64(1), 65-87. <a href="#">doi:10.1016/s0013-7952(01)00093-x</a> , 2002. -                                                                        | ... [61] |
| <b>Deleted:</b> Dutt, V., & Gonzalez, C. (2012a). Why do we want to delay actions on climate change? Effects of probability and timing of climate consequences. <i>Journal of Behavioral Decision Making</i> , 25(2), 154-164. <a href="#">doi:10.1002/bdm.721</a> , 2010. -                       | ... [62] |
| <b>Formatted:</b> Indent: First line: 1.27 cm                                                                                                                                                                                                                                                      |          |
| <b>Deleted:</b> Dutt, V., & Gonzalez, C. (2012c). Human control of climate change. <i>Climatic Change</i> , 111(3-4), 497-518. <a href="#">doi:10.1007/s10584-011-0202-x</a> , 2011. -                                                                                                             | ... [63] |
| <b>Formatted:</b> Indent: First line: 1.27 cm                                                                                                                                                                                                                                                      |          |
| <b>Deleted:</b> Dutt, V., & Gonzalez, C. (2011). A generic dynamic model for landslide risk assessment and management. <i>Engineering Geology</i> , 111(3-4), 497-518. <a href="#">doi:10.1007/s10584-011-0202-x</a> , 2011. -                                                                     | ... [64] |
| <b>Formatted:</b> Indent: First line: 1.27 cm                                                                                                                                                                                                                                                      |          |



43 [Forbes, K. and Broadhead, J.: Forests and landslides: The Role of Trees and Forests in the Prevention of Landslides and](#)  
44 [Rehabilitation of Landslide-Affected Areas in Asia, Technical Report #2, FAO, Bangkok, Thailand, 2013.](#)

45 [Gigerenzer, G. and Selten, R. eds.: Bounded rationality: The adaptive toolbox. MIT press, Cambridge, MA, 2002.](#)

46 [Glade, T., Anderson, M., and Crozier, M.: Landslide hazard and risk J. Wiley, Chichester, England, 2005.](#)

47 [Gonzalez, C. and Dutt, V.: A generic dynamic control task for behavioral research and education. \*Comput. Hum. Behav.\*,](#)  
48 [27\(5\), 1904-1914, doi:10.1016/j.chb.2011.04.015, 2011a.](#)

49 [Gonzalez, C. and Dutt, V.: Instance-based learning: Integrating sampling and repeated decisions from experience. \*Psychol.\*](#)  
50 [Rev., 118\(4\), 523-551, doi:10.1037/a0024558, 2011b.](#)

51 [Grasso, V. F. and Singh, A.: Early Warning Systems: State-of-Art Analysis and Future Directions. UNEP, Nairobi, Kenya,](#)  
52 [In Depth Report, 2009.](#)

53 [Hasson, R., Löfgren, Å., and Visser, M.: Climate change in a public goods game: Investment decision in mitigation versus](#)  
54 [adaptation, \*Ecol. Econ.\*, 70\(2\), 331-338, doi:10.1016/j.ecolecon.2010.09.004, 2010.](#)

55 [Hong, Y., Adler, R., and Huffman, G.: Evaluation of the potential of NASA multi-satellite precipitation analysis in global](#)  
56 [landslide hazard assessment. \*Geophys. Res. Lett.\*, 33\(22\), 2006.](#)

57 [Kahneman, D. and Tversky, A.: Prospect theory: An analysis of decisions under risk. In \*Econometrica\*, 1979.](#)

58 [Knutti, R.: Probabilistic climate change projections for CO<sub>2</sub> stabilization profiles, \*Geophys. Res. Lett.\*, 32\(20\),](#)  
59 [doi:10.1029/2005gl023294, 2005.](#)

60 [Margottini, C., Canuti, P., and Sassa, K. \(Eds.\): \*Landslide Science and Practice, 1\*, Springer-Verlag Berlin Heidelberg,](#)  
61 [Germany, 685 pp., 2011.](#)

62 [Mathew, J., Babu, D. G., Kundu, S., Kumar, K. V., and Pant, C. C.: Integrating intensity-duration-based rainfall threshold](#)  
63 [and antecedent rainfall-based probability estimate towards generating early warning for rainfall-induced landslides](#)  
64 [in parts of the Garhwal Himalaya, India, \*Landslides\*, 11\(4\), 575-588, doi:10.1007/s10346-013-0408-2, 2013.](#)

65 [Meissen, U. and Voisard, A.: Increasing the Effectiveness of Early Warning via Context-aware Alerting, in: \*Proceedings of\*](#)  
66 [the 5th International Information Systems for Crisis Response and Management Conference, Washington, USA,](#)  
67 [431-440, 2008.](#)

68 [Montrasio, L., Valentino, R., and Losi, G. L.: Towards a real-time susceptibility assessment of rainfall-induced shallow](#)  
69 [landslides on a regional scale. \*Nat. Hazards Earth Syst. Sci.\*, 11\(7\), 1927-1947, doi:10.5194/nhess-11-1927-2011,](#)  
70 [2011.](#)

71 [Osuret, J., Atuyambe, L. M., Mayega, R. W., Ssentongo, J., Tumuhame, N., Bua, G. M., Tuhebwe, D., and Bazeyo, W.:](#)  
72 [Coping Strategies for Landslide and Flood Disasters: A Qualitative Study of Mt. Elgon Region, Uganda, \*PLoS\*](#)  
73 [Currents, 8, doi:10.1371/currents.dis.4250a225860babf3601a18e33e172d8b, 2016.](#)

74 [Oven, K.: Landscape, Livelihoods and Risk: community vulnerability to landslides in Nepal, Ph.D. Thesis, Durham](#)  
75 [University, Durham, UK, 2009.](#)

76 [Quansah, J.E., Engel, B., and Rochon, G.L.: Early warning systems: a review. \*Journal of Terrestrial Observation\*, 2\(2\), p.5,](#)

|                                                               |            |
|---------------------------------------------------------------|------------|
| Formatted                                                     | [... [66]  |
| Formatted                                                     | [... [67]  |
| Deleted: Finucane, M. L., Alhakami, A., Slovic, P., & Joh     | [... [68]  |
| Formatted                                                     | [... [69]  |
| Deleted: Glade, T., Anderson, M. G., & Crozier, M. J. (Ed     | [... [70]  |
| Formatted                                                     | [... [71]  |
| Deleted: Gonzalez, C., & Dutt, V. (2011). Instance-based      | [... [72]  |
| Formatted                                                     | [... [73]  |
| Deleted: Grasso, V. F., & Singh, A. (2011). Early warning     | [... [74]  |
| Formatted                                                     | [... [75]  |
| Formatted                                                     | [... [76]  |
| Formatted                                                     | [... [77]  |
| Formatted                                                     | [... [78]  |
| Deleted: Hasson, R., Löfgren, Å., & Visser, M. (2010). Cl     | [... [79]  |
| Formatted                                                     | [... [80]  |
| Formatted                                                     | [... [81]  |
| Deleted: Knutti, R., Joos, F., Müller, S. A., Plattner, G. K. | [... [82]  |
| Deleted: &                                                    |            |
| Deleted: .                                                    |            |
| Deleted:                                                      |            |
| Deleted: . Proc. of the Second World Landslide Forum          |            |
| Formatted                                                     | [... [83]  |
| Deleted: Rome, Italy                                          |            |
| Deleted: 2011, Vol. 2                                         |            |
| Formatted                                                     | [... [84]  |
| Deleted: . .                                                  |            |
| Formatted                                                     | [... [85]  |
| Formatted                                                     | [... [86]  |
| Deleted: Meissen, U., & Voisard, A. (2008, May). Increasi     | [... [87]  |
| Formatted                                                     | [... [88]  |
| Formatted                                                     | [... [89]  |
| Formatted                                                     | [... [90]  |
| Formatted                                                     | [... [91]  |
| Formatted                                                     | [... [92]  |
| Formatted                                                     | [... [93]  |
| Deleted: Montrasio, L., Valentino, R., & Losi, G. L. (2011)   | [... [94]  |
| Formatted                                                     | [... [95]  |
| Formatted                                                     | [... [96]  |
| Deleted: Osuret, J., Atuyambe, L. M., Mayega, R. W., Sse      | [... [97]  |
| Formatted                                                     | [... [98]  |
| Formatted                                                     | [... [99]  |
| Formatted                                                     | [... [100] |

24 [2010.](#)

25 [Reis, H. and Judd, C.: Handbook of research methods in social and personality psychology, Cambridge University Press,](#)

26 [New York, USA, 2013.](#)

27 [Rogers, D. and Tsirkunov, V.: Implementing Hazard Early Warning Systems, Global Facility for Disaster Reduction and](#)

28 [Recovery, Tokyo, Japan, Open File Rep. 11-03, 47 pp., 2011.](#)

29 [Schultz, P. W., Nolan, J. M., Cialdini, R. B., Goldstein, N. J., and Griskevicius, V.: The Constructive, Destructive, and](#)

30 [Reconstructive Power of Social Norms, Psychol. Sci., 18\(5\), 429–434. doi:10.1111/j.1467-9280.2007.01917.x,](#)

31 [2007.](#)

32 [Simon, H.A.: Theories of decision-making in economics and behavioral science. Am. Econ. Rev., 49\(3\), pp.253-283, 1959.](#)

33 [Slovic, P., Peters, E., Finucane, M. L., & MacGregor, D. G. \(2005\). Affect, Risk, and Decision Making. Health Psychol.,](#)

34 [24\(4\), pp.S35-S40.](#)

35 [Thaler, R. H. and Sunstein, C. R.: Nudge. Improving Decisions About Health, Wealth, and Happiness, Yale University](#)

36 [Press, New Haven, USA, 2008.](#)

37 [Tversky, A. and Kahneman, D.: Advances in prospect theory: Cumulative representation of uncertainty. J. Risk](#)

38 [uncertainty, 5\(4\), pp.297-323, 1992.](#)

39 [Wagner, K.: Mental Models of Flash Floods and Landslides, Risk Anal., 27\(3\), 671–682. doi:10.1111/j.1539-](#)

40 [6924.2007.00916.x, 2007.](#)

41 [Wanasolo, I.: Assessing and mapping people's perceptions of vulnerability to landslides in Bududa, Uganda, M. Phil. Thesis,](#)

42 [The Norwegian University of Science and Technology, Trondheim, Norway, 21-30 pp., 2012.](#)

43 [Webb, M. and Ronan, K. R.: Interactive Hazards Education Program for Youth in a Low SES Community: A Quasi-](#)

44 [Experimental Pilot Study, Risk Anal., 34\(10\), 1882–1893, doi:10.1111/risa.12217, 2014.](#)

- Formatted:** Indent: First line: 1.27 cm
- Deleted:** OVEN, K. (2009). Landscape, livelihoods and risk: community vulnerability to landslides in Nepal (Doctoral dissertation, Durham University). .
- Formatted:** Indent: First line: 1.27 cm
- Deleted:** Quigley, K. S., Lindquist, K. A., & Barrett, L. F. (2013). Inducing and measuring emotion: Tips, tricks, and secrets. In H. T. Reis and C. M. Judd (Eds.) Handbook of Research Method...
- Formatted:** Indent: First line: 1.27 cm
- Formatted:** English (UK)
- Formatted:** Font:Not Bold
- Formatted:** Font:Not Bold
- Formatted:** Indent: First line: 1.27 cm
- Formatted:** Font:Not Bold
- Formatted:** Font:Not Bold
- Formatted:** Font:Not Italic
- Deleted:** .
- Deleted:**
- Formatted:** Indent: Left: 0 cm, Hanging: 1.27 cm
- Deleted:** ology
- Deleted:** Slovic, P., Peters, E., Finucane, M.L. and Ma...
- Deleted:** Sunstein, C. and
- Deleted:** The politics of libertarian paternalism. New Haven
- Formatted:** Font:Not Italic
- Formatted:** Font:Not Italic
- Formatted:** Font:Not Italic
- Formatted:** Font:Not Italic
- Deleted:**
- Formatted:** Font:Not Italic
- Formatted:** Font:Not Italic
- Deleted:** Rogers, D., &Tsirkunov, V. (2011). Impleme...
- Deleted:** Sterman, J. D. (2000). Business dynamics: Syst...
- Formatted:** Font:Not Bold
- Formatted:** Font:Not Bold
- Formatted:** Font:Not Bold
- Deleted:** Wagner, K. (2007). Mental models of flash floo...
- Formatted:** Indent: First line: 1.27 cm
- Deleted:** Wanasolo, I. (2012). Assessing and mapping pe...
- Formatted:** Font:Not Bold
- Formatted:** Normal
- Deleted:** Webb, M., & Ronan, K. R. (2014). Interactive H...

Dr. Stefano Luigi Gariano  
Editor, *Journal of Natural Hazards and Earth System Sciences*

September 02<sup>nd</sup>, 2017

Dear Dr. Gariano,

I write to you concerning a manuscript, “Learning in an Interactive Simulation Tool against Landslide Risks: The Role of Amount and Availability of Experiential Feedback,” that I co-authored with my Ph.D. advisor, Dr. Varun Dutt and Mr. Akshit Arora.

We have now modified our manuscript as per your kind suggestions. Please find attached a revised version of our manuscript with point-to-point replies against your comments and suggestions. Point-to-point responses are provided starting on the next page.

We look forward to hearing from you on the publication of this manuscript in the *Journal of Natural Hazards and Earth System Sciences*.

Sincerely,

Pratik Chaturvedi

Ph.D. Scholar, School of Computing and Electrical Engineering

Indian Institute of Technology Mandi

Kamand-175005, Himachal Pradesh, India

Phone: +91-931-313-1129

Email: [prateek@dtrl.drdo.in](mailto:prateek@dtrl.drdo.in)

*Thank you for having improved the quality of the figures. However, please check Figure 2C: the line in the third graph (property wealth) is now different from the previous one).*

**Authors:** Since the quality of figure that we submitted in the first version of the manuscript was poor, we had to re-run ILS to get a better-quality figure. However, the ILS tool is a stochastic simulation tool and thus the re-run gave us a figure that is like the one submitted in the first version of the manuscript; however, the new figure is not identical to the one submitted in the first version of the manuscript. Thus, in the revised version of the manuscript, we have now replaced the figures 2 (A), (B) and (C) with almost similar graphs as were submitted as part of the first submission. We hope that the changes made by us now to Figure 2 are acceptable with you.

*2) There is also another issue that should be addressed before your paper can be published in NHESS open discussion forum. Indeed, I noticed that you did not follow the “Manuscript preparation guidelines for authors” in particular for what concerns references, both in the text and in the list. Thus, I suggest you to please check the reference list following the guidelines. In particular, in the list, a “and” is always needed before the last (or second) author. Moreover, in the text, please replace “&” with “and”, and use “et al.” when citing papers with more than 2 authors. You can find several examples by looking at the “Copernicus Publications Reference Types” guidelines (see: [https://www.natural-hazards-and-earth-system-sciences.net/for\\_authors/manuscript\\_preparation.html](https://www.natural-hazards-and-earth-system-sciences.net/for_authors/manuscript_preparation.html) and [https://www.natural-hazards-and-earth-system-sciences.net/Copernicus\\_Publications\\_Reference\\_Types.pdf](https://www.natural-hazards-and-earth-system-sciences.net/Copernicus_Publications_Reference_Types.pdf) ). Finally, please check the abbreviations of journal names, according to the ISI Journal Title Abbreviations Index (see: [https://www.natural-hazards-and-earth-system-sciences.net/Copernicus\\_Publications\\_Reference\\_Types.pdf](https://www.natural-hazards-and-earth-system-sciences.net/Copernicus_Publications_Reference_Types.pdf) and <http://library.caltech.edu/reference/abbreviations/>).*

**Authors:** We have taken into consideration your advice and we have replaced everywhere “&” with “and” in the manuscript and used “et al.” when citing papers with more than two authors. We have taken care of “Copernicus Publications Reference Types” guidelines in this version of our manuscript for “in-text” citations and references list. Thus, now, the formatting of the manuscript (especially the references) are as per the Journal guidelines.

**Page 7: [3] Formatted** \pratik 25/11/17 10:48 AM

Centered

**Page 7: [4] Formatted** Varun Dutt 09/12/17 2:16 PM

Font:Not Bold

**Page 7: [5] Formatted** Varun Dutt 09/12/17 2:16 PM

Font:Not Bold

**Page 7: [6] Formatted** Varun Dutt 09/12/17 2:16 PM

Font:Not Bold

**Page 7: [7] Formatted** Varun Dutt 09/12/17 2:16 PM

Font:Not Bold

**Page 7: [8] Deleted** \pratik 25/11/17 10:49 AM

Once these parameters are determined, equation 4a and 4b help determine the probability of landslide due to rainfall,  $P(R)$ .

**Page 7: [9] Moved to page 6 (Move #1)** Varun Dutt 07/12/17 12:45 PM

In the ILS tool reported ahead,  $P(R)$  is shown as the probability of landslides due to rainfall in a certain trial.

**Page 7: [10] Deleted** Varun Dutt 07/12/17 3:52 PM

According to Anbalagan (1992), the spatial probability can be provided as seen in

**Page 7: [11] Deleted** Varun Dutt 07/12/17 3:58 PM

This table provides a Total Estimated Hazard (THED) based on the Landslide Hazard Map sectioning.

**Page 7: [12] Formatted** \pratik 27/11/17 7:16 PM

Font:Cambria Math

**Page 7: [13] Formatted** \pratik 25/10/17 12:10 AM

Centered

**Page 7: [14] Formatted** \pratik 25/10/17 12:11 AM

Font:10 pt

**Page 7: [15] Formatted** \pratik 25/10/17 12:11 AM

Font:10 pt

**Page 7: [16] Formatted** \pratik 25/10/17 12:11 AM

Font:10 pt

**Page 7: [17] Formatted** \pratik 25/10/17 12:11 AM

Font:10 pt

**Page 7: [18] Formatted** \pratik 25/10/17 12:11 AM

Font:10 pt

**Page 7: [19] Formatted** \pratik 25/10/17 12:11 AM

Font:10 pt

|                               |                |                          |
|-------------------------------|----------------|--------------------------|
| <b>Page 7: [20] Formatted</b> | <b>\pratik</b> | <b>25/10/17 12:11 AM</b> |
|-------------------------------|----------------|--------------------------|

Font:10 pt

|                               |                |                          |
|-------------------------------|----------------|--------------------------|
| <b>Page 7: [21] Formatted</b> | <b>\pratik</b> | <b>25/10/17 12:11 AM</b> |
|-------------------------------|----------------|--------------------------|

Font:10 pt

|                               |                |                          |
|-------------------------------|----------------|--------------------------|
| <b>Page 7: [22] Formatted</b> | <b>\pratik</b> | <b>25/10/17 12:11 AM</b> |
|-------------------------------|----------------|--------------------------|

Font:10 pt

|                               |                |                          |
|-------------------------------|----------------|--------------------------|
| <b>Page 7: [23] Formatted</b> | <b>\pratik</b> | <b>25/10/17 12:11 AM</b> |
|-------------------------------|----------------|--------------------------|

Font:10 pt

|                               |                |                          |
|-------------------------------|----------------|--------------------------|
| <b>Page 7: [24] Formatted</b> | <b>\pratik</b> | <b>25/10/17 12:11 AM</b> |
|-------------------------------|----------------|--------------------------|

Font:10 pt

|                               |                |                          |
|-------------------------------|----------------|--------------------------|
| <b>Page 7: [25] Formatted</b> | <b>\pratik</b> | <b>25/10/17 12:11 AM</b> |
|-------------------------------|----------------|--------------------------|

Font:10 pt

|                                     |                |                          |
|-------------------------------------|----------------|--------------------------|
| <b>Page 7: [26] Formatted Table</b> | <b>\pratik</b> | <b>25/10/17 12:11 AM</b> |
|-------------------------------------|----------------|--------------------------|

Formatted Table

|                               |                |                          |
|-------------------------------|----------------|--------------------------|
| <b>Page 7: [27] Formatted</b> | <b>\pratik</b> | <b>25/10/17 12:11 AM</b> |
|-------------------------------|----------------|--------------------------|

Font:10 pt

|                               |                |                          |
|-------------------------------|----------------|--------------------------|
| <b>Page 7: [28] Formatted</b> | <b>\pratik</b> | <b>25/10/17 12:11 AM</b> |
|-------------------------------|----------------|--------------------------|

Font:10 pt

|                               |                |                          |
|-------------------------------|----------------|--------------------------|
| <b>Page 7: [29] Formatted</b> | <b>\pratik</b> | <b>25/10/17 12:11 AM</b> |
|-------------------------------|----------------|--------------------------|

Font:10 pt

|                               |                |                          |
|-------------------------------|----------------|--------------------------|
| <b>Page 7: [30] Formatted</b> | <b>\pratik</b> | <b>25/10/17 12:11 AM</b> |
|-------------------------------|----------------|--------------------------|

Font:10 pt

|                               |                |                          |
|-------------------------------|----------------|--------------------------|
| <b>Page 7: [31] Formatted</b> | <b>\pratik</b> | <b>25/10/17 12:11 AM</b> |
|-------------------------------|----------------|--------------------------|

Font:10 pt

|                               |                |                          |
|-------------------------------|----------------|--------------------------|
| <b>Page 7: [32] Formatted</b> | <b>\pratik</b> | <b>25/10/17 12:11 AM</b> |
|-------------------------------|----------------|--------------------------|

Font:10 pt

|                               |                   |                         |
|-------------------------------|-------------------|-------------------------|
| <b>Page 7: [33] Formatted</b> | <b>Varun Dutt</b> | <b>07/12/17 4:06 PM</b> |
|-------------------------------|-------------------|-------------------------|

Font:Italic

|                             |                   |                         |
|-----------------------------|-------------------|-------------------------|
| <b>Page 7: [34] Deleted</b> | <b>Varun Dutt</b> | <b>07/12/17 4:06 PM</b> |
|-----------------------------|-------------------|-------------------------|

From this table, the spatial probability can be calculated by dividing the THED by the corrected Landslide Hazard Evaluation Factor (LHEF) which considers individual and net effect of landslide causal factors also used for Landslide Hazard Zonation (LHZ) mapping.

|                               |                   |                         |
|-------------------------------|-------------------|-------------------------|
| <b>Page 7: [35] Formatted</b> | <b>Varun Dutt</b> | <b>07/12/17 4:08 PM</b> |
|-------------------------------|-------------------|-------------------------|

Font:Italic

|                               |                   |                         |
|-------------------------------|-------------------|-------------------------|
| <b>Page 7: [36] Formatted</b> | <b>Varun Dutt</b> | <b>07/12/17 4:10 PM</b> |
|-------------------------------|-------------------|-------------------------|

Font:Italic

|                               |                   |                         |
|-------------------------------|-------------------|-------------------------|
| <b>Page 7: [37] Formatted</b> | <b>Varun Dutt</b> | <b>07/12/17 4:10 PM</b> |
|-------------------------------|-------------------|-------------------------|

Font:Italic

|                             |                   |                         |
|-----------------------------|-------------------|-------------------------|
| <b>Page 7: [38] Deleted</b> | <b>Varun Dutt</b> | <b>07/12/17 4:13 PM</b> |
|-----------------------------|-------------------|-------------------------|

A landslide occurs on a certain day when a independent random number ( $\sim U(0, 1)$ ) become less than or equal to the corresponding net probability of occurrence of landslide which is a weighted sum of landslide probability due to environment (spatial and triggering factors) and human factors. Once the random number is less than the probability of the corresponding landslide occurrence probability, the landslide occurs.

|                             |                |                         |
|-----------------------------|----------------|-------------------------|
| <b>Page 8: [39] Deleted</b> | <b>\pratik</b> | <b>27/11/17 7:17 PM</b> |
|-----------------------------|----------------|-------------------------|

|                              |                |                          |
|------------------------------|----------------|--------------------------|
| <b>Page 14: [40] Deleted</b> | <b>\pratik</b> | <b>13/12/17 10:55 PM</b> |
|------------------------------|----------------|--------------------------|

|                              |                |                          |
|------------------------------|----------------|--------------------------|
| <b>Page 14: [41] Deleted</b> | <b>\pratik</b> | <b>13/12/17 11:35 PM</b> |
|------------------------------|----------------|--------------------------|

The ILS tool in the feedback-absent condition. Participants were tasked to enter across 30-days how much out of 292 EC they were willing to contribute against landslides. The task was similar in the high-damage feedback-absent condition; however, the damage percentages in the last paragraph were 30%, 9%, and 90%, respectively.

|                              |                |                         |
|------------------------------|----------------|-------------------------|
| <b>Page 17: [42] Deleted</b> | <b>\pratik</b> | <b>27/11/17 7:20 PM</b> |
|------------------------------|----------------|-------------------------|

However, in feedback's absence in ILS, participants were unable to increase their investments for mitigating landslides, even when damages were high compared to low.

### 4.3 Participant Strategies

We analyzed whether an “invest-all” strategy (i.e., investing the entire daily income in mitigating landslides) was reported by participants across different conditions. As mentioned above, the invest-all strategy was an optimal strategy and this strategy's use indicated learning in the ILS tool. Figure 7 shows the proportion of participants reporting the use of the invest-all strategy. Thus, many participants learnt to follow the invest-all strategy in conditions where experiential feedback was present and it was highly damaging compared to participants in the other conditions.

### Discussions and Conclusion

In this paper, we used an existing Interactive Landslide Simulator (ILS) tool for evaluating the effectiveness of feedback in influencing people's decisions against landslide risks. We used the ILS tool in an experiment involving human participants and tested how the amount and availability of experiential feedback in ILS, including the use of ILS tool itself, helped increase people's investment decisions against landslides. Our results agree with our expectations: Experience gained in ILS enabled improved understanding of processes governing landslides and helped participants improve their investments against landslides. Given our results, we believe

that ILS could potentially be used as a landslide-education tool for increasing public understanding and awareness about landslides. The ILS tool can also be used by policymakers to do what-if analyses in different scenarios concerning landslides.

First, high-damaging feedback in ILS tool helped increase people's investment against landslides over time compared to low-damaging feedback in the tool. Furthermore, the experiential feedback helped participants increase their investments against landslides compared to conditions where this feedback was absent. These result can be explained by previous lab-based research on use of repeated feedback or experience (Chaturvedi et al., 2016; Dutt & Gonzalez, 2011; Fischhoff, 2001; Finucane et al., 2000). Repeated experiential feedback likely enables learning by repeated trial-and-error procedures, where participants try different investment values in ILS and observe their effects on occurrence of landslides. This feedback is higher in the condition when damages are more compared to when damages are less and this difference in feedback influences participant investments against landslides. In fact, we observed that the use of the optimal invest-all strategy was maximized when the experiential feedback was highly damaging.

We also believe that the ILS tool can be integrated in teaching courses on landslide sustainable practices in K-12 schools. This course could make use of the ILS tool and focus on educating students about causes, consequences, and risks of hazardous landslides. We believe that the use of ILS tool will make teaching more effective as ILS will help incorporate experiential feedback and social norms in teaching in interactive ways.

**Page 20: [43] Deleted** **Varun Dutt** **09/12/17 9:04 PM**

in ILS tool

**Page 20: [43] Deleted** **Varun Dutt** **09/12/17 9:04 PM**

in ILS tool

**Page 20: [43] Deleted** **Varun Dutt** **09/12/17 9:04 PM**

in ILS tool

**Page 20: [43] Deleted** **Varun Dutt** **09/12/17 9:04 PM**

in ILS tool

**Page 20: [43] Deleted** **Varun Dutt** **09/12/17 9:04 PM**

in ILS tool

**Page 20: [43] Deleted** **Varun Dutt** **09/12/17 9:04 PM**

in ILS tool

**Page 20: [43] Deleted** **Varun Dutt** **09/12/17 9:04 PM**

in ILS tool

**Page 20: [43] Deleted** **Varun Dutt** **09/12/17 9:04 PM**

in ILS tool

**Page 20: [43] Deleted** **Varun Dutt** **09/12/17 9:04 PM**

in ILS tool

**Page 20: [43] Deleted** **Varun Dutt** **09/12/17 9:04 PM**

in ILS tool





people who are loss averse,

**Page 20: [44] Deleted** **Varun Dutt** **09/12/17 9:16 PM**

people who are loss averse,

**Page 20: [44] Deleted** **Varun Dutt** **09/12/17 9:16 PM**

people who are loss averse,

**Page 20: [44] Deleted** **Varun Dutt** **09/12/17 9:16 PM**

people who are loss averse,

**Page 20: [45] Deleted** **Varun Dutt** **03/12/17 3:10 PM**

**Page 20: [45] Deleted** **Varun Dutt** **03/12/17 3:10 PM**

**Page 20: [45] Deleted** **Varun Dutt** **03/12/17 3:10 PM**

**Page 20: [45] Deleted** **Varun Dutt** **03/12/17 3:10 PM**

**Page 20: [45] Deleted** **Varun Dutt** **03/12/17 3:10 PM**

**Page 20: [46] Deleted** **Varun Dutt** **03/12/17 3:13 PM**

**Page 20: [46] Deleted** **Varun Dutt** **03/12/17 3:13 PM**

**Page 20: [46] Deleted** **Varun Dutt** **03/12/17 3:13 PM**

**Page 20: [47] Deleted** **Varun Dutt** **09/12/17 9:09 PM**

is

**Page 20: [47] Deleted** **Varun Dutt** **09/12/17 9:09 PM**

is

**Page 20: [47] Deleted** **Varun Dutt** **09/12/17 9:09 PM**

is

**Page 20: [47] Deleted** **Varun Dutt** **09/12/17 9:09 PM**

is

**Page 20: [47] Deleted** **Varun Dutt** **09/12/17 9:09 PM**

is

**Page 20: [47] Deleted**

**Varun Dutt**

**09/12/17 9:09 PM**

is

**Page 20: [47] Deleted**

**Varun Dutt**

**09/12/17 9:09 PM**

is

**Page 20: [47] Deleted**

**Varun Dutt**

**09/12/17 9:09 PM**

is

**Page 20: [47] Deleted**

**Varun Dutt**

**09/12/17 9:09 PM**

is

**Page 21: [48] Deleted**

**\pratik**

**27/11/17 7:13 PM**

The ILS tool's parameter settings could be customized to a certain geographical area over a certain time period of play. In addition, the ILS tool could be used to present investment actions of other decision-makers (e.g., society or neighbours) compared to one's own investment actions. The presence of investment of other decision-makers in addition to one's own decisions will likely enable the use of social norms towards learning (Schultz et al., 2007). These features makes ILS tool very attractive for landslide education in communities in the future. Furthermore, the ILS tool holds a great promise for policy-research against landslides. For example, in future, researchers may vary different system-response parameters in ILS (e.g. weight of one's decisions and return to mitigation actions) and feedback (e.g. numbers, text messages and images for damage) in order to study their effects on people's decisions against landslides. Here, researchers could evaluate differences in ILS's ability to increase public contributions in the face of other system-response parameters and feedback. In addition, researchers can use the ILS tool to do "what-if" analyses related to landslides for certain time periods and for certain geographical locations. The ILS tool has the ability to be customized to certain geographical area as well as certain time periods, where spatial parameters (e.g., soil type and geology) as well as temporal parameters (e.g., daily rainfall) can be defined for the area of interest. Once the environmental factors have been accounted for, the ILS tool enables researchers to account for assumptions on human factors (contribution against landslides) with real-world consequences (injury, fatality, and infrastructure damage). Such assumptions may help researchers model human decisions in computational cognitive models, which are based upon influential theories of how people make decisions from feedback (Dutt & Gonzalez, 2012; Gonzalez & Dutt, 2011). In summary, these features make ILS tool apt for policy research, especially for areas that are prone to landslides. This research will also help test the ILS tool and its applicability in different real-world settings.

**Page 21: [49] Deleted**

**Varun Dutt**

**09/12/17 9:15 PM**

Although we could investigate that the ILS tool causes the use of optimal invest-all strategies among people in conditions where experiential feedback is highly damaging; however, future research should focus on investigating more deeply about the nature of learning that the tool imparts among people. As people's investments for mitigating landslides in ILS directly influences the risk of landslides due to human and environmental factors, investments indeed have the potential of educating people about landslide risks. Still, it is important to investigate how investing money in the ILS tool truly educates people about landslides. Our current research was a preliminary work and the assumptions made by us in ILS model may not be realistic, but in future, we will manipulate the probabilities related to landslide and damages caused to see effects of different

settings of ILS on participants' risk perception, attitude and behaviour. However, up to certain extent, we were able to capture the people's behavior.

**Page 21: [50] Moved to page 20 (Move #2) Varun Dutt 09/12/17 9:15 PM**

According to Slovic et al. (2005), people who are loss averse, tend to increase their contribution in case of a risk over time. In our case also, the participants' in all the experimental conditions, did not started contributing good amount upfront, but with time as they experienced some losses due to their poor investments, they have started contributing large amount of money to reduce the risk.

**Page 21: [51] Deleted Varun Dutt 09/12/17 4:07 PM**

we will try to find without causing reduction in income, only due to fatality and injury what effect it have on participants' investment

**Page 21: [52] Deleted Varun Dutt 09/12/17 4:09 PM**

Another idea is to test whether people would continue to invest large money or choose to migrate.

**Page 21: [53] Deleted Varun Dutt 09/12/17 4:10 PM**

This idea is very interesting to study because The nature of landslide hazard, including its notorious fame of being extremely hard, if not impossible, to predict, makes it quite different from other hazards such as flood and drought, and general climate risk.

**Page 21: [54] Deleted Varun Dutt 09/12/17 4:49 PM**

to calculate P(I) to showcase the potential of using ILS in the real-world

**Page 24: [55] Deleted \pratik 03/09/17 10:36 PM**

### *Acknowledgements*

This research was partially supported by a grant from Himachal Pradesh State Council for Science, Technology & Environment to Varun Dutt (grant number: IITM / HPSCSTE / VD / 130). We thank Akanksha Jain and Sushmita Negi, Centre for Converging Technologies, University of Rajasthan, India for providing preliminary support for data collection in this project.

**Page 24: [56] Deleted \pratik 29/08/17 10:52 PM**

Becker, J. S., Paton, D., Johnston, D. M., & Ronan, K. R. (2013). Salient beliefs about earthquake hazards and household preparedness. Risk analysis, 33(9), 1710-1727.

**Page 24: [57] Deleted Varun Dutt 01/09/17 5:20 PM**

Available at:  
(<http://iret.co.in/Docs/IJETEE/Volume%2010/Issue10/25.%20Remote%20Sensing%20Based%20Regional%20Landslide%20Risk%20Assessment.pdf>) (Accessed 29 August 2017)

**Page 24: [58] Deleted \pratik 29/08/17 11:07 PM**

Chaturvedi P., Dutt V., Jaiswal B., Tyagi N., Sharma S., Mishra S. P., Dhar S., & Joglekar P. N. (2014). Remote Sensing Based Regional Landslide Risk Assessment. International Journal of Emerging Trends in Electrical and Electronics (IJETEE –ISSN: 2320-9569) Vol. 10, Issue. 10, 135-140.

**Page 24: [59] Deleted \pratik 29/08/17 11:21 PM**

Chaturvedi, P., & Dutt, V. (2015). Evaluating the Public Perceptions of Landslide Risks in the Himalayan Mandi Town. In Proceedings of the Human Factors and Ergonomics Society Annual Meeting (Vol. 59, No. 1, pp. 1491-1495). SAGE Publications.

**Page 24: [60] Deleted** \pratik 29/08/17 11:25 PM

Clerici, A., Perego, S., Tellini, C., & Vescovi, P. (2002). A procedure for landslide susceptibility zonation by the conditional analysis method. *Geomorphology*, 48(4), 349-364.

**Page 24: [61] Deleted** \pratik 29/08/17 11:26 PM

Dai, F. C., Lee, C. F., & Ngai, Y. Y. (2002). Landslide risk assessment and management: an overview. *Engineering geology*, 64(1), 65-87.

**Page 24: [62] Deleted** \pratik 29/08/17 11:27 PM

Dutt, V., & Gonzalez, C. (2012a). Why do we want to delay actions on climate change? Effects of probability and timing of climate consequences. *Journal of Behavioral Decision Making*, 25(2), 154-164.

Dutt, V., & Gonzalez, C. (2012b). Human control of climate change. *Climatic change*, 111(3-4), 497-518.

**Page 24: [63] Deleted** \pratik 29/08/17 11:31 PM

Dutt, V., & Gonzalez, C. (2012c). Decisions from experience reduce misconceptions about climate change. *Journal of Environment Psychology*, 32(1), 19-29. doi: 10.1016/j.jenvp.2011.10.003

**Page 24: [64] Deleted** \pratik 29/08/17 11:33 PM

Dutt, V., & Gonzalez, C. (2011). A generic dynamic control task for behavioral research and education. Retrieved from CMU website: <http://repository.cmu.edu/sds/118/>

Fischer, C. (2008). Feedback on household electricity consumption: a tool for saving energy? *Energy Efficiency*, 1(1), 79-104. doi: 10.1016/j.jenvp.2011.10.003

**Page 25: [65] Formatted** \pratik 13/12/17 10:33 PM

Indent: First line: 0 cm

**Page 25: [66] Formatted** \pratik 13/12/17 10:34 PM

Font:Not Italic

**Page 25: [67] Formatted** \pratik 11/12/17 11:12 PM

Font:Not Italic

**Page 25: [68] Deleted** \pratik 29/08/17 11:35 PM

Finucane, M. L., Alhakami, A., Slovic, P., & Johnson, S. M. (2000). The affect heuristic in judgments of risks and benefits. *Journal of behavioral decision making*, 13(1), 1-17.

Geosciences group. (2015). Experimental Landslide Early Warning System for Rainfall Triggered Landslides. Retrieved from [http://bhuvan-noeda.nrsc.gov.in/disaster/disaster/tools/landslide/doc/landslide\\_warning.pdf](http://bhuvan-noeda.nrsc.gov.in/disaster/disaster/tools/landslide/doc/landslide_warning.pdf)

**Page 25: [69] Formatted** \pratik 03/09/17 8:41 PM

Indent: First line: 1.27 cm

**Page 25: [70] Deleted** \pratik 29/08/17 11:43 PM

Glade, T., Anderson, M. G., & Crozier, M. J. (Eds.). (2006). *Landslide hazard and risk*. John Wiley & Sons.

**Page 25: [71] Formatted** \pratik 03/09/17 7:40 PM

Indent: First line: 1.27 cm

**Page 25: [72] Deleted** \pratik 29/08/17 11:37 PM

Gonzalez, C., & Dutt, V. (2011). Instance-based learning: Integrating sampling and repeated decisions from experience. *Psychological review*, 118(4), 523.

**Page 25: [73] Formatted** \pratik 03/09/17 7:40 PM

Indent: First line: 1.27 cm

**Page 25: [74] Deleted** \pratik 30/08/17 11:27 PM

Grasso, V. F., & Singh, A. (2011). Early warning systems: State-of-art analysis and future directions. Draft report, UNEP.

**Page 25: [75] Formatted** \pratik 03/09/17 7:40 PM

Indent: First line: 1.27 cm

**Page 25: [76] Formatted** \pratik 01/12/17 10:40 PM

Indent: First line: 0 cm

**Page 25: [77] Formatted** \pratik 01/12/17 10:42 PM

Font:Not Italic

**Page 25: [78] Formatted** \pratik 11/12/17 11:12 PM

Font:Not Italic

**Page 25: [79] Deleted** \pratik 29/08/17 11:38 PM

Hasson, R., Löfgren, Å., & Visser, M. (2010). Climate change in a public goods game: investment decision in mitigation versus adaptation. *Ecological Economics*, 70(2), 331-338.

ISDR 2004 Terminology: basic terms of disaster risk reduction. <http://www.unisdr.org/eng/library/lib-terminology-eng%20home.htm>, International Strategy for Disaster Reduction secretariat, Geneva.

**Page 25: [80] Formatted** \pratik 01/09/17 11:28 PM

Subscript

**Page 25: [81] Formatted** \pratik 03/09/17 7:40 PM

Indent: First line: 1.27 cm

**Page 25: [82] Deleted** \pratik 29/08/17 11:40 PM

Knutti, R., Joos, F., Müller, S. A., Plattner, G. K., & Stocker, T. F. (2005). Probabilistic climate change projections for CO2 stabilization profiles. *Geophysical Research Letters*, 32(20).

**Page 25: [83] Formatted** \pratik 03/09/17 7:40 PM

Indent: First line: 1.27 cm

**Page 25: [84] Formatted** \pratik 24/10/17 2:29 PM

Indent: First line: 1.27 cm

**Page 25: [85] Formatted** \pratik 03/09/17 7:40 PM

Indent: First line: 1.27 cm

**Page 25: [86] Formatted** \pratik 03/09/17 7:40 PM

Indent: Left: 1.27 cm

**Page 25: [87] Deleted** \pratik 31/08/17 12:01 AM

Meissen, U., &Voisard, A. (2008, May). Increasing the effectiveness of early warning via context-aware alerting. In Proceedings of the 5th International Conference, on Information Systems for Crisis Response and Management (ISCRAM) (pp. 431-440).

**Page 25: [88] Formatted** \pratik 30/08/17 11:16 PM

Font:Not Bold

**Page 25: [89] Formatted** \pratik 30/08/17 11:16 PM

Font:Not Bold

**Page 25: [90] Formatted** \pratik 30/08/17 11:16 PM

Font:Not Bold

**Page 25: [91] Formatted** \pratik 03/09/17 7:40 PM

Indent: First line: 1.27 cm

**Page 25: [92] Formatted** \pratik 30/08/17 11:16 PM

Font:Not Bold

**Page 25: [93] Formatted** \pratik 30/08/17 11:16 PM

Font:Not Bold

**Page 25: [94] Deleted** \pratik 30/08/17 11:16 PM

Montrasio, L., Valentino, R., &Losi, G. L. (2011). Towards a real-time susceptibility assessment of rainfall-induced shallow landslides on a regional scale. Natural Hazards and Earth System Science, 11(7), 1927-1947.

**Page 25: [95] Formatted** \pratik 03/09/17 7:40 PM

Indent: First line: 1.27 cm

**Page 25: [96] Formatted** \pratik 03/09/17 7:40 PM

Indent: Left: 1.27 cm

**Page 25: [97] Deleted** \pratik 30/08/17 12:07 AM

Osuret, J., Atuyambe, L. M., Mayega, R. W., Ssentongo, J., Tumuhamy, N., Bua, G. M., Tuhebwe, D., & Bazeyo, W. (2016). Coping strategies for landslide and flood disasters: a qualitative study of Mt. Elgon Region, Uganda. PLoS currents, 8.

**Page 25: [98] Formatted** \pratik 03/09/17 7:41 PM

Indent: First line: 1.27 cm

**Page 25: [99] Formatted** \pratik 01/12/17 10:34 PM

Font:Not Italic

**Page 25: [100] Formatted** \pratik 13/12/17 10:22 PM

Font:Not Italic

**Page 26: [101] Deleted** \pratik 29/08/17 11:50 PM

Quigley, K. S., Lindquist, K. A., & Barrett, L. F. (2013). Inducing and measuring emotion: Tips, tricks, and secrets. In H. T. Reis and C. M. Judd (Eds.) Handbook of Research Methods in Social and Personality Psychology (p. 220-250). New York: Cambridge University Press.

**Page 26: [102] Deleted** **Varun Dutt** **13/12/17 1:19 PM**

Slovic, P., Peters, E., Finucane, M.L. and MacGregor, D.G.: Affect, risk, and decision making. *Health psychology*, 24(4S), p.S35, 2005.

**Page 26: [103] Deleted** **\pratik** **30/08/17 10:51 PM**

Rogers, D., &Tsirkunov, V. (2011). Implementing hazard early warning systems. Report, Global Facility for Disaster Reduction and Recovery.

Schultz, P. W., Nolan, J. M., Cialdini, R. B., Goldstein, N. J., & Griskevicius, V. (2007). The constructive, destructive, and reconstructive power of social norms. *Psychological science*, 18(5), 429-434.

**Page 26: [104] Deleted** **\pratik** **30/08/17 10:44 PM**

Sterman, J. D. (2000). *Business dynamics: Systems thinking and modeling for a complex world*. Cambridge, MA: McGraw Hill.

**Page 26: [105] Deleted** **\pratik** **30/08/17 11:03 PM**

Wagner, K. (2007). Mental models of flash floods and landslides. *Risk Analysis*, 27(3), 671-682.

**Page 26: [106] Deleted** **\pratik** **30/08/17 10:55 PM**

Wanasolo, I. (2012). Assessing and mapping people's perceptions of vulnerability to landslides in Bududa, Uganda.

**Page 26: [107] Deleted** **\pratik** **30/08/17 11:02 PM**

Webb, M., & Ronan, K. R. (2014). Interactive Hazards Education Program for Youth in a Low SES Community: A Quasi-Experimental Pilot Study. *Risk analysis*, 34(10), 1882-1893.

## **Appendix A**

### **Instructions of the Experiment**

Welcome!

You are a resident of Mandi district of Himachal Pradesh, India, a township in the lap of Himalayas. You live in an area that is highly prone to landslides due to a number of environmental factors (e.g., the prevailing geological conditions and rainfall). During the monsoon season, due to high intensity and prolonged period of rainfall, a number of landslides may occur in the Mandi district. These landslides may cause fatalities and injuries to you, your family, and to your friends, who reside in the same area. In addition, landslides may also damage your property and cause loss to your property wealth.

This study consists of a task, where you will be making repetitive decisions to invest money in order to mitigate landslides. Every trial, you'll earn certain money between 0 and 10 points. This money is available to you to



invest against landslides. You may invest certain amount from the money available to you; however, if you do not wish to invest anything, you may invest 0.0 against landslides on a particular trial. Based upon your investment against landslides, you'll get feedback on whether a landslide occurred and whether there was an associated loss of life, injury, or property damage (all three events are independent and they can occur at the same time).

**Your total wealth at any point in the game is the following: sum of the amounts you did not invest against landslides across days + your property wealth - damages to you, your family, your friends, and to your property due to landslides.** Your property wealth is assumed to be 100 points at the start of the game. The amount of money **not invested against landslides** increases your total wealth. **Your goal is to maximize your total wealth in the game.**

Whenever a landslide occurs, if it causes fatality, then your daily earnings will be reduced by 5% of its present value at that time and if landslide causes injury to someone, then the daily earnings will be reduced by 2.5% of its present value at that time. Thus, the amount available to you to invest against landslides will reduce with each fatality and injury due to landslides. Furthermore, if a landslide occurs and it causes property damage, then your property wealth will be reduced by 80% of its present value at that time; however, the money available to you to invest against landslides due to your daily earnings will remain unaffected.

Generally, landslides are triggered by two main factors: environmental factors (e.g., rainfall; outside one's control) and investment factors (money invested against landslides; within one's own control). The total probability of landslide is a weighted average of probability of landslide due to environment factors and probability of landslide due to investment factors. The money you invest against landslides reduces the probability of landslide due to investment factors and also reduces the total probability of landslides. However, the money invested against landslides is lost and it cannot become a part of your total wealth.

At the end of the game, we'll convert your total wealth into INR and pay you for your effort. For this conversion, a ratio of 100 total wealth points = INR 1 will be followed. In addition, you will be paid INR 30 as base payment for your effort in the task. Please remember that your goal is to maximize your total wealth in the game.

Starting Game Parameters

Your wealth: **20 Million**

When a landslide occurs:

If a death occurs, your daily income will be reduced by **50%** of its current value.

If an injury takes place, your daily income will be reduced by **25%** of its current value.

If a property damage occurs, your wealth will be reduced by **50%** of your property wealth.

**Best of Luck!**
